# Supplementary material
Source: HighWire-hosted journal article supplement (https://erj.ersjournals.com/content/49/3/1600803)
Supplement: inline-supplementary-material-1 [file inline-supplementary-material-1.pdf]

**Supplementary Materials for**  
**"An Updated Systematic Review and Meta-Analysis for Treatment of Multidrug-Resistant Tuberculosis"**

**Table of Contents**

|                              |          |
|------------------------------|----------|
| <b>PICO Questions.....</b>   | <b>2</b> |
| <b>Search Strategy .....</b> | <b>3</b> |
| <b>Abstraction Form.....</b> | <b>5</b> |

## PICO<sup>1</sup> Questions

In patients with rifampicin resistance (RR-TB) or MDR-TB, which individual drugs in the regimens are more or less likely to lead to the outcomes listed below?

| Population                                                                                                                                                                                                                                                                                                                                                                                                                                                                                              | Intervention                                   | Comparator                            | Outcomes                                                                                                                                                                                                                                                                            |
|---------------------------------------------------------------------------------------------------------------------------------------------------------------------------------------------------------------------------------------------------------------------------------------------------------------------------------------------------------------------------------------------------------------------------------------------------------------------------------------------------------|------------------------------------------------|---------------------------------------|-------------------------------------------------------------------------------------------------------------------------------------------------------------------------------------------------------------------------------------------------------------------------------------|
| RR-TB only<br><br>MDR-TB <u>without</u> resistance <u>or</u> severe intolerance to the second line drugs<br><br>MDR-TB <u>with</u> resistance <u>or</u> severe intolerance to<br>a. Fluoroquinolones<br>b. 2 <sup>nd</sup> line injectables, both classes<br>c. Pyrazinamide<br>d. 2 or 3 Group 4 drugs <sup>2</sup><br>e. Fluoroquinolones + 2 <sup>nd</sup> line injectables (i.e. XDR-TB +/- other resistance)<br><br>Children (0-4, 5-14y), persons with HIV, pregnant women, persons with diabetes | A 2 <sup>nd</sup> line regimen which includes: |                                       | <ul style="list-style-type: none"> <li>• Cured/completed by the end of treatment</li> <li>• Culture conversion by 6 months</li> <li>• Failure</li> <li>• Relapse</li> <li>• Survival (or death)</li> <li>• Adverse reactions from TB drugs (severity, type, organ class)</li> </ul> |
|                                                                                                                                                                                                                                                                                                                                                                                                                                                                                                         | - pyrazinamide                                 | - no pyrazinamide                     |                                                                                                                                                                                                                                                                                     |
|                                                                                                                                                                                                                                                                                                                                                                                                                                                                                                         | - injectable agents (Km/Am/Cm)                 | - no injectable agents (Km/Am/Cm)     |                                                                                                                                                                                                                                                                                     |
|                                                                                                                                                                                                                                                                                                                                                                                                                                                                                                         | - prothionamide/ethionamide                    | - no prothionamide/ethionamide        |                                                                                                                                                                                                                                                                                     |
|                                                                                                                                                                                                                                                                                                                                                                                                                                                                                                         | - cycloserine                                  | - no cycloserine                      |                                                                                                                                                                                                                                                                                     |
|                                                                                                                                                                                                                                                                                                                                                                                                                                                                                                         | - PAS                                          | - no PAS                              |                                                                                                                                                                                                                                                                                     |
|                                                                                                                                                                                                                                                                                                                                                                                                                                                                                                         | - later-generation fluoroquinolone             | - no later-generation fluoroquinolone |                                                                                                                                                                                                                                                                                     |
|                                                                                                                                                                                                                                                                                                                                                                                                                                                                                                         | - bedaquiline                                  | - no bedaquiline                      |                                                                                                                                                                                                                                                                                     |
|                                                                                                                                                                                                                                                                                                                                                                                                                                                                                                         | - delamanid                                    | - no delamanid                        |                                                                                                                                                                                                                                                                                     |

<sup>1</sup> PICO = Population, Intervention, Comparator, Outcome

<sup>2</sup> Group 4 drugs are: ethionamide, prothionamide, cycloserine, terizidone, PAS

## Search Strategy

### Medline search

#### MDR or XDR

1. exp multidrug resistant tuberculosis/ or exp extensively drug resistant tuberculosis/
2. (multidrug resistant tuberculosis or extensive\* drug resistant tuberculosis or MDR-TB or XDR-TB).ti,ab,kw.
3. (tuberc\* and (MDR or XDR or drug resistanc\* or multidrug resistanc\* or multi drug resistanc\* or poly drug resistanc\* or extensive\* drug resistanc\*)).ti,ab,kw.

#### Drugs

4. exp Fluoroquinolones/ or exp Quinolones/ or exp Levofloxacin/ or (fluoroquinolone\* or quinolone\* or levofloxacin or Levaquin or moxifloxacin or Avelox).ti,ab,kw.
5. exp Kanamycin/ or exp Amikacin/ or exp Capreomycin/ or exp Aminoglycosides/ or (Kanamycin or Amikacin or Capreomycin or (tuberc\* and injectable\*)).ti,ab,kw.
6. exp Pyrazinamide/ or exp Ethambutol/ or exp Cycloserine/ or exp Ethionamide/ or exp Prothionamide/ or (Pyrazinamide or Ethambutol or para-aminosalicylic acid or Cycloserine or Ethionamide or Prothionamide).ti,ab,kw.
7. high dose.ti,ab,kw. and ((INH or isoniazid).ti,ab,kw. or exp isoniazid/)

#### Efficacy

8. exp Treatment Outcome/ or exp Prognosis/ or exp Death/ or exp Mortality/ or exp Treatment Failure/ or exp Survival/ or exp Recurrence/ or exp Patient Dropouts/ or exp Patient Compliance/
9. (Treatment Outcome\* or Prognosis or Death or Mortality or Treatment Failure or drug treatment failure or failure or Survival or Recurrence or relapse or Patient Dropout\* or dropout or non-compliance or compliance or efficacy or effective\* or cure or success\* or default or adheren\* or conversion\* or microbiologic conversion or smear conversion or culture conversion or sputum conversion).ti,ab,kw.

#### Toxicity

10. exp Treatment Outcome/ or exp Prognosis/ or exp Death/ or exp Mortality/ or exp Treatment Failure/ or exp Survival/ or exp Recurrence/ or exp Toxicity Tests/ or exp Drug Tolerance/ or exp "Drug-Related Side Effects and Adverse Reactions"/
11. (Treatment outcome\* or Prognosis or Death or Mortality or Treatment Failure or drug treatment failure or failure or Survival or Recurrence or relapse or Toxicity Test\* or toxicity or Drug Tolerance or toler\* or intolerance or Side Effect\* or Adverse Drug Reaction\* or adverse drug event\* or adverse event\* or adverse reaction\* or safe\* or drug safety).ti,ab,kw.

#### New drugs

12. (Bedaquiline or TMC-207 or delamanid or OPC-67683).ti,ab,kw.

#### Final steps

13. 1 or 2 or 3
14. 4 or 5 or 6 or 7
15. 8 or 9
16. 10 or 11
17. 13 and 14 and 15
18. 13 and 14 and 16
19. 12 and 13 and 15
20. 12 and 13 and 16

21. limit 17 to (humans and yr="2009 -Current")
22. limit 18 to (humans and yr="2009 -Current")
23. limit 19 to (humans and yr="2012 -Current")
24. limit 20 to (humans and yr="2012 -Current")
25. 21 or 22
26. 23 or 24
27. 25 or 26

(EmBase and the Cochrane Library were searched using the same strategy)

## Abstraction Form

Study ID:

Reviewer:

Date of Review:

### Inclusion criteria

|                                              |                                     |
|----------------------------------------------|-------------------------------------|
| Author, Year                                 |                                     |
| Lab-confirmed MDR-TB                         | Yes / No / Not reported             |
| Number of participants with MDR-TB $\geq$ 25 | Yes / No                            |
| Definition of Outcomes                       | Meet WHO/Laserson's criteria or not |
| TB site stratified by site of diseases       | i.e. pulmonary, extrapulmonary      |
| Eligible                                     | Yes / No                            |
| If not eligible, what is the reason?         |                                     |

### Demographic and clinical information

|                                  |  |
|----------------------------------|--|
| Author, Year                     |  |
| Study years                      |  |
| Study location                   |  |
| Study design                     |  |
| Male : Female                    |  |
| Age                              |  |
| HIV (n of tested)                |  |
| ARV treatment (n receiving/HIV+) |  |
| Diabetes                         |  |
| AFB Smear                        |  |
| Cavitation                       |  |
| Bilateral disease                |  |
| Any previous TB treatment        |  |
| Previous FLD treatment only      |  |
| Previous SLD treatment           |  |

### Drug resistance profile

|                              |  |
|------------------------------|--|
| Methods of MDR confirmation  |  |
| DST methods for drugs tested |  |

|                                  |  |
|----------------------------------|--|
| XDR in total MDR patients        |  |
| Pre-XDR SLI                      |  |
| Pre-XDR FQN                      |  |
| Median No. of drugs resistant to |  |
| Z resistance                     |  |
| E resistance                     |  |
| S resistance                     |  |
| KM resistance                    |  |
| AM resistance                    |  |
| CM resistance                    |  |
| OFX resistance                   |  |
| CFX resistance                   |  |
| MFX resistance                   |  |
| LFX resistance                   |  |
| PAS resistance                   |  |
| CS resistance                    |  |
| ETO resistance                   |  |
| PTO resistance                   |  |
| Other                            |  |

### **Treatment regimens**

|                                |  |
|--------------------------------|--|
| Standardized or Individualized |  |
| DOT?                           |  |
| No. of drugs used              |  |
| Total treatment duration       |  |
| Intensive phase duration       |  |
| Z used                         |  |
| E used                         |  |
| S used                         |  |
| KM/AM used                     |  |
| CM used                        |  |
| OFX/CFX used                   |  |
| MFX used                       |  |

|                        |  |
|------------------------|--|
| LFX used               |  |
| GFX used               |  |
| PAS used               |  |
| CS/TRD used            |  |
| ETO/PTO used           |  |
| High-dose INH used     |  |
| Any Group 5 drugs used |  |
| Bedaquiline used       |  |
| Delamanid used         |  |

### **Treatment outcomes**

|                            |  |
|----------------------------|--|
| 6-month culture conversion |  |
| Cure                       |  |
| Complete                   |  |
| Failure                    |  |
| Death                      |  |
| Loss to follow-up          |  |
| Relapse                    |  |
| Follow-up months           |  |
| Reported adverse events?   |  |
| Grade 3-5 AEs              |  |
| Drug stopped due to AEs    |  |
| Drug responsible for AEs   |  |
| Any additional information |  |
