# Supplementary material
Source: HighWire-hosted journal article supplement (https://erj.ersjournals.com/content/49/3/1600803)
Supplement: inline-supplementary-material-2 [file inline-supplementary-material-2.pdf]

Supplementary Tables for  
"An Updated Systematic Review and Meta-Analysis for Treatment of Multidrug-Resistant Tuberculosis"

NOTE THAT REFERENCES ARE FOUND IN MAIN TEXT

Contents

|                                                                                                                                                                                               |           |
|-----------------------------------------------------------------------------------------------------------------------------------------------------------------------------------------------|-----------|
| <b>Supplemental Table S1. Characteristics and participants of the included studies .....</b>                                                                                                  | <b>2</b>  |
| <b>Supplemental Table S2. Summary of study quality of the included studies– by different criterias .....</b>                                                                                  | <b>6</b>  |
| <b>Supplemental Table S3. Drug susceptibility test results for MDR patients reported in the included studies .</b>                                                                            | <b>10</b> |
| <b>Supplemental Table S4. Treatment regimens reported in the included studies .....</b>                                                                                                       | <b>13</b> |
| <b>Supplemental Table S5. End of treatment outcomes reported in the included studies .....</b>                                                                                                | <b>17</b> |
| <b>Supplemental Table S6. Adverse events reported in the included studies .....</b>                                                                                                           | <b>20</b> |
| <b>Supplemental Table S7. Summary table of demographic and clinical characteristics of studies reporting severe adverse events (SAE). .....</b>                                               | <b>24</b> |
| <b>Supplemental Table S8. Pooled success rate according to resistant pattern .....</b>                                                                                                        | <b>25</b> |
| <b>Supplemental Table S9- Covariates associated with end of treatment outcomes for patients who received standardized regimens, XDR patients excluded<sup>1</sup> .....</b>                   | <b>26</b> |
| <b>Supplemental Table S10. Covariates associated with end of treatment outcomes for patients who received individualized regimens, XDR patients excluded (n=38 cohorts)<sup>1</sup> .....</b> | <b>28</b> |
| <b>Supplemental Table S11. Covariates associated with end of treatment outcomes for XDR patients (n=15 cohorts)<sup>1</sup> .....</b>                                                         | <b>30</b> |



| Reference | Author, Year                             | Study years | Study location            | Standardized/ Individualized | Treatment outcome stratified by resistant pattern <sup>1</sup> | Number of participants Men:Women | Median age                      | HIV+ /n of tested | ARV treatment (n receiving/HIV+) | Diabetes | Smear positive | Cavitation | Any previous TB treatment | Previous FLD treatment | Previous SLD treatment |
|-----------|------------------------------------------|-------------|---------------------------|------------------------------|----------------------------------------------------------------|----------------------------------|---------------------------------|-------------------|----------------------------------|----------|----------------|------------|---------------------------|------------------------|------------------------|
| [39]      | Van der Walt, 2013                       | 2000-2004   | South Africa              | Standardized                 | NR                                                             | 841:549                          | 36.3<br>(SD 10.6) <sup>2</sup>  | 544/1390          | NR                               | NR       | 861/1390       | NR         | 1259/1390                 | NR                     | NR                     |
| [40]      | Ahmad, 2015                              | 2012-2013   | Pakistan                  | Individualized               | Only MDR                                                       | 92:104                           | 31.5<br>(SD 14.7) <sup>2</sup>  | NR                | NR                               | 17/196   | 179/196        | 68/195     | 177/196                   | 157/196                | 20/196                 |
| [41]      | Blondal, 2012                            | 2001-2003   | Estonia                   | Individualized               | MDR/XDR –<br>Separate outcomes                                 | 154:57                           | 42.9<br>(range 17.0–76.0)       | 5/211             | NR                               | NR       | 118/211        | 161/211    | 110/211                   | 76/211                 | 34/211                 |
| [42]      | Bloss, 2010                              | 2000-2004   | Latvia                    | Individualized               | NR                                                             | 780:247                          | 42.3<br>(SD 12.7) <sup>2</sup>  | 32/1027           | NR                               | NR       | NR             | 222/1027   | NR                        | 532/1027               | 116/1027               |
| [43, 44]  | Cegielski, 2015; Yuen, 2015 <sup>4</sup> | 2005-2008   | Multination               | Individualized               | MDR/XDR –<br>Separate outcomes                                 | 798:446                          | 33                              | 160/779           | NR                               | 166/1244 | 1064/1244      | 779/1244   | NR                        | 890/1244               | 182/1244               |
| [45]      | Chan, 2013                               | 2000-2008   | Taiwan                    | Individualized               | NR                                                             | 494:157                          | 49.0<br>(IQR 39.0-61.0)         | 6/651             | NR                               | 234/651  | 419/651        | 282/651    | 406/651                   | NR                     | NR                     |
| [46]      | Chang, 2012                              | 1996-2009   | Hong Kong                 | Individualized               | NR                                                             | 144:50                           | 45.0 <sup>2</sup>               | NR                | NR                               | NR       | 145/194        | 101/194    | NR                        | 93/194                 | NR                     |
| [47]      | Charles, 2014                            | 2010-2013   | Haiti                     | Individualized               | Only MDR                                                       | 50:60                            | 28.0<br>(IQR 23.0–37.0)         | 27/110            | 27/27                            | NR       | NR             | NR         | 95/110                    | NR                     | NR                     |
| [48]      | Dawson, 2015                             | 2012-2013   | South Africa and Tanzania | Individualized               | NR                                                             | 16:10                            | 32.4<br>(SD 10.0) <sup>2</sup>  | 7/25              | NR                               | NR       | 26/26          | NR         | NR                        | NR                     | NR                     |
| [49]      | Dheda, 2010                              | 2002-2008   | South Africa              | Individualized               | Only XDR                                                       | 85:89                            | 33.0<br>(IQR 26.0–45.0)         | 82/174            | 52/82                            | NR       | NR             | NR         | NR                        | NR                     | 125/174                |
| [50]      | Diacon, 2014 <sup>3</sup>                | N/A         | Multination               | Individualized               | NR                                                             | 45:21                            | 32.0<br>(range 18.0–63.0)       | 5/66              | NR                               | NR       | 66/66          | 54/66      | NR                        | NR                     | 0/66                   |
|           |                                          |             |                           | Individualized               | NR                                                             | 40:26                            | 34<br>(range 18–57)             | 14/66             | NR                               | NR       | 66/66          | 56/66      | NR                        | NR                     | 0/66                   |
| [51]      | El-Din, 2015                             | 2006-2009   | Egypt                     | Individualized               | NR                                                             | 99:39                            | 37.6<br>(SD 12.3) <sup>2</sup>  | 1/138             | NR                               | 48/138   | NR             | NR         | 132/138                   | NR                     | NR                     |
| [52]      | Ferrer, 2010                             | 1994-2007   | USA                       | Individualized               | NR                                                             | 35:13                            | 45 <sup>2</sup>                 | 0/46              | NR                               | 13/46    | 46/46          | NR         | 37/46                     | NR                     | NR                     |
| [53]      | Gegia, 2012                              | 2008-2010   | Georgia                   | Individualized               | MDR/XDR –<br>Mixed outcomes                                    | 271:109                          | 38<br>(range 16–81)             | 5/380             | NR                               | 35/380   | NR             | NR         | 334/380                   | 253/380                | 81/380                 |
| [54]      | Guglielmetti, 2015                       | 2011-2013   | France                    | Individualized               | MDR/XDR –<br>Mixed outcomes                                    | 28:7                             | 39<br>(IQR 31–41)               | 0/35              | NR                               | 5/35     | 29/34          | 29/34      | 24/35                     | 7/35                   | 17/35                  |
| [55]      | Hafkin, 2013                             | 2005-2009   | Botswana                  | Individualized               | MDR/XDR –<br>Mixed outcomes                                    | 51:19                            | 38<br>(IQR 26–46)               | 40/70             | 36/40                            | NR       | NR             | NR         | 70/70                     | 52/70                  | 10/70                  |
| [56]      | Helbling, 2014                           | 2003-2010   | Switzerland               | Individualized               | Only MDR                                                       | 27:24                            | 26<br>(range 2–56)              | NR                | NR                               | NR       | 25/44          | NR         | 12/36                     | NR                     | NR                     |
| [57]      | Hicks, 2014                              | 2009-2010   | South Africa              | Individualized               | MDR/XDR –<br>Separate outcomes                                 | 36:48                            | 8<br>(IQR 4–12)                 | 64/83             | 62/64                            | NR       | 40/84          | NR         | 32/84                     | NR                     | 7/84                   |
| [58]      | Jana, 2009                               | 2003-2008   | India                     | Individualized               | NR                                                             | 21:10                            | 31.42<br>(SD 10.1) <sup>2</sup> | 0/31              | NR                               | NR       | NR             | 23/31      | NR                        | NR                     | NR                     |
| [59]      | Jiang, 2013 <sup>3</sup>                 | 2005-2010   | China                     | Individualized               | MDR/XDR –<br>Mixed outcomes                                    | 35:37                            | 43.8<br>(SD 10.3) <sup>2</sup>  | 0/72              | NR                               | NR       | 67/72          | 58/72      | NR                        | 39/72                  | 16/72                  |
|           |                                          |             |                           | Individualized               | MDR/XDR –<br>Mixed outcomes                                    | 54:32                            | 45.1<br>(SD 14.6) <sup>2</sup>  | 0/86              | NR                               | NR       | 75/86          | 46/86      | NR                        | 42/86                  | 20/86                  |

| Reference | Author, Year            | Study years | Study location | Standardized/<br>Individualized | Treatment outcome stratified by resistant pattern <sup>1</sup> | Number of participants<br>Men:Women | Median age                          | HIV+<br>/n of tested | ARV treatment<br>(n receiving/HIV+) | Diabetes | Smear positive | Cavitation | Any previous TB treatment | Previous FLD treatment | Previous SLD treatment |
|-----------|-------------------------|-------------|----------------|---------------------------------|----------------------------------------------------------------|-------------------------------------|-------------------------------------|----------------------|-------------------------------------|----------|----------------|------------|---------------------------|------------------------|------------------------|
| [60]      | Jo, 2014                | 2006-2012   | South Korea    | Individualized                  | MDR/XDR – Mixed outcomes                                       | 43:27                               | 40.6 (SD 12.9) <sup>2</sup>         | 0/9                  | NR                                  | 14/70    | 58/70          | 27/70      | NR                        | 49/70                  | 39/70                  |
| [61]      | Karagoz, 2009           | 1995-2000   | Turkey         | Individualized                  | NR                                                             | 142:0                               | 39 (SD 11.0) <sup>2</sup>           | NR                   | NR                                  | 17/142   | NR             | NR         | NR                        | NR                     | 61/142                 |
| [62]      | Kempker, 2015           | 2009-2012   | Georgia        | Individualized                  | Only MDR                                                       | 103:38                              | 34.9 (IQR 27.0–46.0)                | 6/141                | NR                                  | 16/141   | NR             | 30/141     | NR                        | 52/141                 | 10/141                 |
| [63]      | Koh, 2013               | 2010-2012   | Korea          | Individualized                  | NR                                                             | 104:51                              | 43                                  | 0/155                | NR                                  | 7/155    | 95/155         | 88/155     | 77/155                    | NR                     | NR                     |
| [64]      | Kvasnovsky, 2011        | 2006-2008   | South Africa   | Individualized                  | Only XDR                                                       | 101:105                             | 36.2 (SD 11.6) <sup>2</sup>         | 108/206              | 59/108                              | NR       | 89/184         | 50/184     | NR                        | NR                     | 155/203                |
| [65]      | Kwak, 2015 <sup>3</sup> | 2006-2010   | South Korea    | Individualized                  | MDR/XDR – Mixed outcomes                                       | 69:54                               | 37.0 (IQR 27.0–56.0)                | NR                   | NR                                  | 10/123   | NR             | 85/123     | 54/123                    | NR                     | NR                     |
|           |                         | 1996–2000   | South Korea    | Individualized                  | NR                                                             | 52:34                               | 41.0 (IQR 26.0–55.0)                | NR                   | NR                                  | NR       | NR             | NR         | NR                        | NR                     | NR                     |
|           |                         | 2001–2005   | South Korea    | Individualized                  | NR                                                             | 72:53                               | 35.0 (IQR 25.0–50.0)                | NR                   | NR                                  | NR       | NR             | NR         | NR                        | NR                     | NR                     |
| [66]      | Laniado-Laborín, 2012   | 2006-2010   | Mexico         | Individualized                  | MDR/XDR – Mixed outcomes                                       | 25:17                               | 37.8 (SD 14.5) <sup>2</sup>         | NR                   | NR                                  | 8/42     | NR             | NR         | NR                        | NR                     | NR                     |
| [67]      | Lee, 2011 <sup>3</sup>  | 2002-2008   | South Korea    | Individualized                  | MDR/XDR – Mixed outcomes                                       | 69:54                               | 42.0 (range 28.0-51.0)              | NR                   | NR                                  | 17/123   | NR             | NR         | 59/123                    | NR                     | NR                     |
|           |                         |             |                | Individualized                  | MDR/XDR – Mixed outcomes                                       | 27:21                               | 42.0 (range 28-53)                  | NR                   | NR                                  | 5/48     | NR             | NR         | 25/48                     | NR                     | NR                     |
| [68]      | Leimane, 2010           | 2000-2004   | Latvia         | Individualized                  | MDR/XDR – Separate outcomes                                    | 780:247                             | 43.1                                | 32/1027              | NR                                  | NR       | 526/1027       | 704/1027   | NR                        | 532/1018               | 116/1018               |
| [69]      | Liu, 2011               | 1996-2009   | China          | Individualized                  | MDR/XDR – Separate outcomes                                    | 381:195                             | 41.0 (range 2.0–99.0)               | 0/576                | NR                                  | 62/576   | 425/576        | 318/576    | 395/576                   | NR                     | NR                     |
| [70]      | Marks, 2014             | 2005-2007   | USA            | Individualized                  | MDR/XDR – Separate outcomes                                    | 68:67                               | 38.2                                | 14/116               | 10/14                               | 24/121   | 103/135        | 58/135     | NR                        | NR                     | NR                     |
| [71]      | Milanov, 2015           | 2009-2010   | Bulgaria       | Individualized                  | MDR/XDR – Separate outcomes                                    | 35:15                               | 42.8 (range 18.0-77.0) <sup>2</sup> | 0/50                 | NR                                  | NR       | 31/50          | NR         | 31/50                     | NR                     | NR                     |
| [72]      | Miller, 2012            | 2000-2004   | Russian        | Individualized                  | MDR/XDR – Mixed outcomes                                       | 306:101                             | 40.0 (range 17.0–71.0)              | NR                   | NR                                  | NR       | NR             | 249/407    | NR                        | NR                     | NR                     |
| [73]      | Modongo, 2012           | 2007-?      | Botswana       | Individualized                  | NR                                                             | 140:73                              | 38.0 (IQR 28.0-48.0)                | 135/213              | 130/135                             | NR       | NR             | NR         | NR                        | NR                     | NR                     |
| [74]      | Ndjeka, 2015            | 2013-2014   | South Africa   | Individualized                  | MDR/XDR – Mixed outcomes                                       | 55:36                               | 35.0 (IQR 26.0–42.0)                | 54/91                | 54/54                               | NR       | NR             | NR         | NR                        | NR                     | NR                     |
| [75]      | O'Donnell, 2013         | 2006-2007   | South Africa   | Individualized                  | Only XDR                                                       | 49:65                               | 35.0 (IQR 30.0–42.0)                | 82/107               | 50/82                               | NR       | 67/114         | NR         | 92/107                    | 50/107                 | 42/107                 |
| [76]      | O'Donnell, 2015         | 2008-2010   | South Africa   | Individualized                  | Only XDR                                                       | 95:121                              | 35.5                                | 165/197              | 114/165                             | NR       | 108/206        | NR         | 207/216                   | NR                     | NR                     |
| [77]      | Palacios, 2012          | 1996-2005   | Peru           | Individualized                  | Only MDR                                                       | 40:12                               | 30.5 (SD 10.7) <sup>2</sup>         | 52/52                | 27/52                               | 1/52     | 19/52          | 22/52      | 50/52                     | NR                     | NR                     |
| [78]      | Pazarli, 2013           | 2000-2005   | Turkey         | Individualized                  | NR                                                             | 81:22                               | 40.5 (SD 13.5) <sup>2</sup>         | 0/103                | NR                                  | 17/103   | NR             | NR         | NR                        | NR                     | NR                     |

| Reference | Author, Year                   | Study years | Study location | Standardized/<br>Individualized | Treatment<br>outcome stratified<br>by resistant<br>pattern <sup>1</sup> | Number of<br>participants<br>Men:Women | Median age                             | HIV+<br>/n of tested | ARV treatment<br>(n receiving/HIV+) | Diabetes | Smear<br>positive | Cavitation | Any<br>previous TB<br>treatment | Previous<br>FLD<br>treatment | Previous<br>SLD<br>treatment |
|-----------|--------------------------------|-------------|----------------|---------------------------------|-------------------------------------------------------------------------|----------------------------------------|----------------------------------------|----------------------|-------------------------------------|----------|-------------------|------------|---------------------------------|------------------------------|------------------------------|
| [79]      | Pietersen, 2014                | 2002-2008   | South Africa   | Individualized                  | Only XDR                                                                | 58:49                                  | 33<br>(IQR 27–43)                      | 44/107               | 35/44                               | NR       | NR                | NR         | NR                              | NR                           | 95/107                       |
| [80]      | Podewils, 2013                 | 1999-2006   | Philippine     | Individualized                  | MDR/XDR –<br>Mixed outcomes                                             | 351:232                                | 37.5<br>(IQR 28.9–48.9)                | NR                   | NR                                  | 144/583  | NR                | 311/583    | 571/583                         | NR                           | NR                           |
| [81]      | Qazi, 2011                     | 2008-2010   | Pakistan       | Individualized                  | NR                                                                      | 35:50                                  | 29.7<br>(SD 12.6) <sup>2</sup>         | NR                   | NR                                  | 8/85     | 80/85             | 34/85      | NR                              | NR                           | 11/85                        |
| [82]      | Roberts-<br>Witteveen,<br>2015 | 1999-2010   | Australia      | Individualized                  | MDR/XDR –<br>Mixed outcomes                                             | 28:16                                  | 31.0<br>(range 15.0–73.0)              | 2/9                  | NR                                  | NR       | 28/44             | 16/44      | 18/44                           | NR                           | NR                           |
| [83]      | Satti, 2012                    | 2008-2009   | Lesotho        | Individualized                  | NR                                                                      | 79:45                                  | 39.5<br>(IQR 33.0–46.0)                | 94/134               | 90/94                               | NR       | 15/134            | 96/134     | 129/134                         | NR                           | 18/134                       |
| [84]      | Seddon, 2012                   | 2003-2008   | South Africa   | Individualized                  | MDR/XDR –<br>Mixed outcomes                                             | 46:65                                  | 4.2<br>(IQR 1.6-9.0)                   | 43/100               | 40/43                               | NR       | 53/85             | 38/109     | 28/111                          | NR                           | NR                           |
| [85]      | Seung, 2014                    | 1996-2007   | Peru           | Individualized                  | MDR/XDR -<br>Separate outcomes                                          | 128:85                                 | 28.0<br>(IQR 16.0)                     | NR                   | NR                                  | NR       | NR                | 80/159     | 201/213                         | NR                           | NR                           |
| [86]      | Shean, 2013                    | 2002-2008   | South Africa   | Individualized                  | Only XDR                                                                | 62:53                                  | NR                                     | 48/115               | 34/48                               | NR       | NR                | NR         | NR                              | NR                           | 69/115                       |
| [87]      | Smith, 2015                    | 2005-2008   | Russia         | Individualized                  | MDR/XDR –<br>Mixed outcomes                                             | 171:31                                 | 42.0                                   | 0/202                | NR                                  | NR       | 161/202           | 189/202    | NR                              | 69/202                       | 73/202                       |
| [88]      | Tang, 2013                     | 2006-2011   | China          | Individualized                  | MDR/XDR -<br>Separate outcomes                                          | 395:191                                | 44.4<br>(SD 15.1) <sup>2</sup>         | 0/586                | NR                                  | 80/586   | NR                | 389/586    | 461/586                         | NR                           | NR                           |
| [89]      | Tang, 2015                     | 2009-2011   | China          | Individualized                  | Only XDR                                                                | 43:22                                  | 44.0<br>(range 18.0–64.0) <sup>2</sup> | 0/65                 | NR                                  | 12/65    | NR                | 65/65      | 65/65                           | NR                           | NR                           |
| [90]      | Van Heurck,<br>2013            | 1996-2010   | Belgian        | Individualized                  | MDR/XDR -<br>Separate outcomes                                          | 52:26                                  | 33.0<br>(range 26.0-39.0)              | 10/78                | NR                                  | NR       | NR                | NR         | 39/84                           | 16/84                        | 23/84                        |
| [91]      | Xu, 2012                       | 2008-2011   | China          | Individualized                  | MDR/XDR<br>Separate outcomes                                            | 29:10                                  | 38.0<br>(range 20.0-54.0) <sup>2</sup> | 0/39                 | NR                                  | 1/39     | 36/39             | 36/39      | 39/39                           | NR                           | 39/39                        |

**Abbreviations:** ARV - Anti-retroviral, FLD - First line drug, SLD - Second line drugs, TB -Tuberculosis NR -Not reported

**Footnotes:**

<sup>1</sup> MDR: studies (cohorts) that reported only MDR or end of treatment outcome stratified by resistant pattern (i.e. MDR vs XDR)

Mixed MDR or not reported: studies that did not report end of treatment outcomes stratified by resistance pattern, or did not specify if XDR patients were included

Only XDR: cohorts that reported only XDR patients or end of treatment outcomes were stratified by resistance pattern

<sup>2</sup> Mean reported

<sup>3</sup> Studies 26, 33, 35, 50, 59, 65, 67 reported more than one cohort; studies 26, 33, 35 only have the demographic information for the whole study instead of each cohort.

<sup>4</sup> Studies 43 & 44 are unpublished data (by the time this systematic review was conducted) obtained by Dr. Dick Menzies through personal communication.

We combined the data of studies 43 & 44 because they used the same cohort. Cegielski, 2015 described the final outcomes of the treatment while Yuen, 2015 described the short-term outcomes.

Supplemental Table S2. Summary of study quality of the included studies– by different criterias

|           | DST information    |                                      |                          |                          | Treatment regimen information        |                                               |                                         |                                                  | Outcome information |                                                   |                           |                                  | Score/Total possible score <sup>3</sup> | Score percentage |      |
|-----------|--------------------|--------------------------------------|--------------------------|--------------------------|--------------------------------------|-----------------------------------------------|-----------------------------------------|--------------------------------------------------|---------------------|---------------------------------------------------|---------------------------|----------------------------------|-----------------------------------------|------------------|------|
| Reference | Author, Year       | Methods of MDR confirmation reported | DST for EMB/PZA reported | DST for FQN/SLI reported | Duration of intensive phase reported | No. of drugs used in intensive phase reported | Duration of continuation phase reported | No. of drugs used in continuation phase reported | Drug doses reported | Outcome meet WHO/Laserson definition <sup>1</sup> | Default rate <sup>2</sup> | AE definition or reference given | Identified the drug responsible for AE  |                  |      |
| [18]      | Baghaei, 2011      | Yes                                  | No                       | No                       | Yes                                  | Yes                                           | Yes                                     | Yes                                              | Yes                 | Yes                                               | 0.0%                      | Yes                              | Yes                                     | 10/12            | 83%  |
| [19]      | Bonnet, 2011       | Yes                                  | No                       | Yes                      | Yes                                  | Yes                                           | Yes                                     | Yes                                              | No                  | Yes                                               | 36.8%                     | N/A                              | N/A                                     | 7/10             | 70%  |
| [20]      | Brust, 2013        | No                                   | No                       | No                       | Yes                                  | Yes                                           | Yes                                     | Yes                                              | Yes                 | Only AE                                           | N/A                       | Yes                              | Yes                                     | 7/10             | 70%  |
| [21]      | Brust, 2010        | Yes                                  | No                       | No                       | Yes                                  | Yes                                           | Yes                                     | Yes                                              | No                  | Yes                                               | 20.8%                     | N/A                              | N/A                                     | 6/10             | 60%  |
| [22]      | Brust, 2012        | No                                   | No                       | No                       | Yes                                  | Yes                                           | Yes                                     | Yes                                              | No                  | 6-month culture conversion                        | N/A                       | No                               | No                                      | 4/10             | 40%  |
| [23]      | Chand, 2014        | No                                   | Yes                      | No                       | Yes                                  | Yes                                           | Yes                                     | Yes                                              | No                  |                                                   | Yes                       | 38.3%                            | N/A                                     | N/A              | 6/10 |
| [24]      | Duraisamy, 2014    | Yes                                  | No                       | No                       | Yes                                  | Yes                                           | Yes                                     | Yes                                              | No                  | Yes                                               | 15.6%                     | No                               | No                                      | 6/12             | 50%  |
| [25]      | Farley, 2011       | No                                   | Yes                      | No                       | Yes                                  | Yes                                           | Yes                                     | Yes                                              | No                  | Yes                                               | 20.9%                     | N/A                              | N/A                                     | 6/10             | 60%  |
| [26]      | Ganzaya, 2013      | Yes                                  | No                       | No                       | No                                   | No                                            | No                                      | No                                               | No                  | Yes                                               | 15.2%                     | N/A                              | N/A                                     | 2/10             | 20%  |
| [27]      | Hire, 2014         | No                                   | No                       | No                       | No                                   | Yes                                           | No                                      | Yes                                              | No                  | Only AE                                           | N/A                       | Yes                              | No                                      | 3/10             | 30%  |
| [28]      | Jain, 2014         | No                                   | Yes                      | No                       | Yes                                  | Yes                                           | Yes                                     | Yes                                              | No                  | Yes                                               | 23.1%                     | Yes                              | Yes                                     | 8/12             | 67%  |
| [29]      | Joseph, 2011       | Yes                                  | No                       | Yes                      | Yes                                  | Yes                                           | Yes                                     | Yes                                              | No                  | Yes                                               | 13.2%                     | Yes                              | Yes                                     | 9/12             | 75%  |
| [30]      | Malla, 2009        | Yes                                  | Yes                      | No                       | Yes                                  | Yes                                           | Yes                                     | Yes                                              | No                  | No                                                | 16.6%                     | No                               | No                                      | 6/12             | 50%  |
| [31]      | Modongo, 2014      | No                                   | No                       | No                       | Yes                                  | Yes                                           | Yes                                     | No                                               | Yes                 | Only AE                                           | N/A                       | Yes                              | Yes                                     | 6/10             | 60%  |
| [32]      | Mugabo, 2015       | No                                   | No                       | No                       | No                                   | Yes                                           | No                                      | No                                               | No                  | Yes                                               | 26.7%                     | N/A                              | N/A                                     | 2/10             | 20%  |
| [33]      | Nagaraja, 2012     | Yes                                  | Yes                      | No                       | No                                   | No                                            | No                                      | No                                               | No                  | No                                                | 28.6%                     | Yes                              | Yes                                     | 4/12             | 33%  |
| [34]      | Oladimeji, 2014    | No                                   | No                       | No                       | Yes                                  | Yes                                           | Yes                                     | Yes                                              | No                  | 6-month culture conversion                        | N/A                       | N/A                              | N/A                                     | 4/8              | 50%  |
| [35]      | Rodriguez, 2013    | Yes                                  | No                       | No                       | Yes                                  | Yes                                           | Yes                                     | Yes                                              | No                  |                                                   | Yes                       | 8.6%                             | N/A                                     | N/A              | 6/10 |
| [36]      | Tabarsi, 2009      | No                                   | No                       | Yes                      | Yes                                  | Yes                                           | Yes                                     | Yes                                              | No                  | Yes                                               | 0.0%                      | N/A                              | N/A                                     | 7/10             | 70%  |
| [37]      | Tabarsi, 2010      | Yes                                  | Yes                      | Yes                      | Yes                                  | Yes                                           | Yes                                     | Yes                                              | No                  | Yes                                               | 0.0%                      | N/A                              | N/A                                     | 9/10             | 90%  |
| [38]      | Tabarsi, 2011      | Yes                                  | No                       | No                       | No                                   | Yes                                           | No                                      | No                                               | Yes                 | Yes                                               | 13.2%                     | No                               | No                                      | 4/12             | 33%  |
| [39]      | Van der Walt, 2013 | No                                   | No                       | No                       | Yes                                  | Yes                                           | Yes                                     | Yes                                              | No                  | Yes                                               | 20.8%                     | Yes                              | Yes                                     | 7/12             | 58%  |
| [40]      | Ahmad, 2015        | Yes                                  | Yes                      | Yes                      | Yes                                  | Yes                                           | Yes                                     | No                                               | No                  | Yes                                               | 8.7%                      | No                               | No                                      | 7/12             | 58%  |

| Reference | Author, Year                | Methods of MDR confirmation reported | DST for EMB/PZA reported | DST for FQN/SLI reported | Duration of intensive phase reported | No. of drugs used in intensive phase reported | Duration of continuation phase reported | No. of drugs used in continuation phase reported | Drug doses reported | Outcome meet WHO/Laserson definition <sup>1</sup> | Default rate <sup>2</sup> | AE definition or reference given | Identified the drug responsible for AE | Score/Total possible score <sup>3</sup> | Score percentage |
|-----------|-----------------------------|--------------------------------------|--------------------------|--------------------------|--------------------------------------|-----------------------------------------------|-----------------------------------------|--------------------------------------------------|---------------------|---------------------------------------------------|---------------------------|----------------------------------|----------------------------------------|-----------------------------------------|------------------|
| [41]      | Blondal, 2012               | Yes                                  | Yes                      | Yes                      | Yes                                  | Yes                                           | Yes                                     | Yes                                              | No                  | Yes                                               | 22.3%                     | No                               | No                                     | 8/12                                    | 67%              |
| [42]      | Bloss, 2010                 | Yes                                  | No                       | No                       | No                                   | No                                            | No                                      | No                                               | Yes                 | Yes                                               | 14.1%                     | Yes                              | Yes                                    | 5/12                                    | 42%              |
| [43, 44]  | Cegielski, 2015; Yuen, 2015 | Yes                                  | Yes                      | Yes                      | Yes                                  | Yes                                           | Yes                                     | Yes                                              | No                  | Yes                                               | 21.8%                     | N/A                              | N/A                                    | 8/10                                    | 80%              |
| [45]      | Chan, 2013                  | No                                   | Yes                      | Yes                      | No                                   | No                                            | No                                      | No                                               | No                  | Yes                                               | N/R                       | N/A                              | N/A                                    | 3/10                                    | 30%              |
| [46]      | Chang, 2012                 | No                                   | Yes                      | Yes                      | No                                   | No                                            | No                                      | No                                               | No                  | Yes                                               | N/R                       | N/A                              | N/A                                    | 3/10                                    | 30%              |
| [47]      | Charles, 2014               | Yes                                  | Yes                      | Yes                      | No                                   | No                                            | No                                      | No                                               | No                  | Only AE                                           | N/A                       | No                               | Yes                                    | 4/10                                    | 40%              |
| [48]      | Dawson, 2015                | Yes                                  | Yes                      | Yes                      | No                                   | No                                            | No                                      | No                                               | Yes                 | Only AE                                           | N/A                       | Yes                              | No                                     | 5/10                                    | 50%              |
| [49]      | Dheda, 2010                 | No                                   | Yes                      | Yes                      | No                                   | No                                            | No                                      | No                                               | No                  | 6-month culture conversion                        | N/A                       | Yes                              | No                                     | 3/10                                    | 30%              |
| [50]      | Diacon, 2014                | Yes                                  | Yes                      | Yes                      | No                                   | No                                            | No                                      | No                                               | Yes                 | Yes                                               | 28.8%                     | Yes                              | No                                     | 6/12                                    | 50%              |
| [51]      | El-Din, 2015                | No                                   | No                       | No                       | No                                   | No                                            | No                                      | No                                               | No                  | Yes                                               | 0.7%                      | Yes                              | No                                     | 3/12                                    | 25%              |
| [52]      | Ferrer, 2010                | Yes                                  | Yes                      | Yes                      | No                                   | No                                            | No                                      | No                                               | Yes                 | Yes                                               | 23.9%                     | N/A                              | N/A                                    | 5/10                                    | 50%              |
| [53]      | Gegia, 2012                 | Yes                                  | Yes                      | Yes                      | No                                   | No                                            | No                                      | No                                               | No                  | Yes                                               | 21.8%                     | N/A                              | N/A                                    | 4/10                                    | 40%              |
| [54]      | Guglielmetti, 2015          | Yes                                  | Yes                      | Yes                      | No                                   | No                                            | No                                      | No                                               | No                  | 6-month culture conversion                        | N/A                       | Yes                              | Yes                                    | 5/10                                    | 50%              |
| [55]      | Hafkin, 2013                | Yes                                  | Yes                      | Yes                      | Yes                                  | No                                            | No                                      | No                                               | No                  | 6-month culture conversion                        | N/A                       | Yes                              | Yes                                    | 6/10                                    | 60%              |
| [56]      | Helbling, 2014              | Yes                                  | Yes                      | Yes                      | No                                   | No                                            | No                                      | No                                               | No                  | Yes                                               | 13.7%                     | No                               | No                                     | 4/12                                    | 33%              |
| [57]      | Hicks, 2014                 | Yes                                  | No                       | Yes                      | Yes                                  | No                                            | Yes                                     | No                                               | No                  | Yes                                               | 6.0%                      | No                               | Yes                                    | 7/12                                    | 58%              |
| [58]      | Jana, 2009                  | Yes                                  | No                       | No                       | No                                   | No                                            | No                                      | No                                               | No                  | No                                                | 0.0%                      | No                               | Yes                                    | 3/12                                    | 25%              |
| [59]      | Jiang, 2013                 | Yes                                  | Yes                      | Yes                      | No                                   | No                                            | No                                      | No                                               | No                  | Yes                                               | 6.3%                      | Yes                              | Yes                                    | 7/12                                    | 58%              |
| [60]      | Jo, 2014                    | Yes                                  | Yes                      | Yes                      | No                                   | No                                            | No                                      | No                                               | No                  | Yes                                               | 15.7%                     | N/A                              | N/A                                    | 4/10                                    | 40%              |
| [61]      | Karagoz, 2009               | Yes                                  | No                       | No                       | No                                   | No                                            | No                                      | No                                               | Yes                 | Yes                                               | 11.3%                     | No                               | No                                     | 3/12                                    | 25%              |
| [62]      | Kempker, 2015               | Yes                                  | No                       | Yes                      | Yes                                  | No                                            | No                                      | No                                               | No                  | Yes                                               | 31.4%                     | N/A                              | N/A                                    | 4/10                                    | 40%              |
| [63]      | Koh, 2013                   | Yes                                  | Yes                      | Yes                      | No                                   | No                                            | No                                      | No                                               | Yes                 | Only AE                                           | N/A                       | Yes                              | Yes                                    | 6/10                                    | 60%              |
| [64]      | Kvasnovsky, 2011            | Yes                                  | No                       | No                       | No                                   | No                                            | No                                      | No                                               | No                  | Only AE                                           | N/A                       | Yes                              | Yes                                    | 3/10                                    | 30%              |
| [65]      | Kwak, 2015                  | No                                   | No                       | No                       | No                                   | No                                            | No                                      | No                                               | No                  | Yes                                               | 6.0%                      | Yes                              | Yes                                    | 4/12                                    | 33%              |

| Reference | Author, Year            | Methods of MDR confirmation reported | DST for EMB/PZA reported | DST for FQN/SLI reported | Duration of intensive phase reported | No. of drugs used in intensive phase reported | Duration of continuation phase reported | No. of drugs used in continuation phase reported | Drug doses reported | Outcome meet WHO/Laserson definition | Default rate | AE definition or reference given | Identified the drug responsible for AE | Score/Total possible score | Score percentage |
|-----------|-------------------------|--------------------------------------|--------------------------|--------------------------|--------------------------------------|-----------------------------------------------|-----------------------------------------|--------------------------------------------------|---------------------|--------------------------------------|--------------|----------------------------------|----------------------------------------|----------------------------|------------------|
| [66]      | Laniado-Laborin, 2012   | Yes                                  | No                       | No                       | No                                   | No                                            | No                                      | No                                               | No                  | 6-month culture conversion           | N/A          | No                               | No                                     | 1/10                       | 10%              |
| [67]      | Lee, 2011               | No                                   | No                       | Yes                      | No                                   | No                                            | No                                      | No                                               | No                  | Yes                                  | 10.5%        | No                               | No                                     | 2/12                       | 17%              |
| [68]      | Leimane, 2010           | Yes                                  | Yes                      | Yes                      | Yes                                  | No                                            | Yes                                     | No                                               | No                  | Yes                                  | 14.1%        | No                               | No                                     | 6/12                       | 50%              |
| [69]      | Liu, 2011               | Yes                                  | Yes                      | Yes                      | No                                   | No                                            | No                                      | No                                               | No                  | Yes                                  | 18.9%        | N/A                              | N/A                                    | 4/10                       | 40%              |
| [70]      | Marks, 2014             | No                                   | Yes                      | Yes                      | No                                   | No                                            | No                                      | No                                               | No                  | Yes                                  | 11.2%        | Yes                              | Yes                                    | 5/12                       | 42%              |
| [71]      | Milanov, 2015           | Yes                                  | Yes                      | Yes                      | Yes                                  | No                                            | Yes                                     | No                                               | No                  | Yes                                  | 2.0%         | N/A                              | N/A                                    | 7/10                       | 70%              |
| [72]      | Miller, 2012            | Yes                                  | No                       | No                       | No                                   | No                                            | No                                      | No                                               | No                  | Yes                                  | 23.6%        | No                               | No                                     | 2/12                       | 17%              |
| [73]      | Modongo, 2012           | No                                   | No                       | No                       | No                                   | No                                            | No                                      | No                                               | No                  | Only AE                              | N/A          | Yes                              | Yes                                    | 2/10                       | 20%              |
| [74]      | Ndjeka, 2015            | No                                   | No                       | Yes                      | No                                   | No                                            | No                                      | No                                               | Yes                 | 6-month culture conversion           | N/A          | Yes                              | Yes                                    | 4/10                       | 40%              |
| [75]      | O'Donnell, 2013         | Yes                                  | No                       | No                       | No                                   | No                                            | No                                      | No                                               | No                  | Yes                                  | 16.7%        | Yes                              | Yes                                    | 4/12                       | 33%              |
| [76]      | O'Donnell, 2015         | Yes                                  | No                       | Yes                      | No                                   | No                                            | No                                      | No                                               | No                  | 6-month culture conversion           | N/A          | N/A                              | N/A                                    | 2/8                        | 25%              |
| [77]      | Palacios, 2012          | No                                   | Yes                      | Yes                      | No                                   | No                                            | No                                      | No                                               | No                  | Yes                                  | 17.3%        | Yes                              | No                                     | 4/12                       | 33%              |
| [78]      | Pazarli, 2013           | Yes                                  | No                       | No                       | No                                   | No                                            | No                                      | No                                               | No                  | Yes                                  | 1.9%         | N/A                              | N/A                                    | 3/10                       | 30%              |
| [79]      | Pietersen, 2014         | Yes                                  | Yes                      | Yes                      | No                                   | No                                            | No                                      | No                                               | No                  | Yes                                  | 15.0%        | N/A                              | N/A                                    | 4/10                       | 40%              |
| [80]      | Podewils, 2013          | No                                   | No                       | Yes                      | Yes                                  | Yes                                           | Yes                                     | Yes                                              | No                  | Yes                                  | 15.1%        | N/A                              | N/A                                    | 6/10                       | 60%              |
| [81]      | Qazi, 2011              | Yes                                  | Yes                      | Yes                      | No                                   | No                                            | No                                      | No                                               | No                  | 6-month culture conversion           | N/A          | N/A                              | N/A                                    | 3/8                        | 38%              |
| [82]      | Roberts-Witteveen, 2015 | Yes                                  | Yes                      | Yes                      | Yes                                  | Yes                                           | Yes                                     | No                                               | No                  | Yes                                  | 11.4%        | Yes                              | Yes                                    | 9/12                       | 75%              |
| [83]      | Satti, 2012             | Yes                                  | No                       | No                       | No                                   | No                                            | No                                      | No                                               | No                  | Yes                                  | 3.0%         | N/A                              | N/A                                    | 3/10                       | 30%              |
| [84]      | Seddon, 2012            | Yes                                  | No                       | Yes                      | Yes                                  | Yes                                           | Yes                                     | No                                               | Yes                 | Yes                                  | 7.2%         | N/A                              | N/A                                    | 8/10                       | 80%              |
| [85]      | Seung, 2014             | No                                   | No                       | Yes                      | No                                   | No                                            | No                                      | No                                               | No                  | 6-month culture conversion           | N/A          | N/A                              | N/A                                    | 1/8                        | 13%              |



| Reference | Author, Year                   | Methods of MDR confirmation reported | DST for EMB/PZA reported | DST for FQN/SLI reported | Duration of intensive phase reported | No. of drugs used in intensive phase reported | Duration of continuation phase reported | No. of drugs used in continuation phase reported | Drug doses reported | Outcome meet WHO/Laserson definition | Default rate | AE definition or reference given | Identified the drug responsible for AE | Score/Total possible score | Score percentage |
|-----------|--------------------------------|--------------------------------------|--------------------------|--------------------------|--------------------------------------|-----------------------------------------------|-----------------------------------------|--------------------------------------------------|---------------------|--------------------------------------|--------------|----------------------------------|----------------------------------------|----------------------------|------------------|
| [86]      | Shean, 2013                    | No                                   | No                       | No                       | No                                   | No                                            | No                                      | No                                               | Yes                 | 6-month culture conversion           | N/A          | Yes                              | Yes                                    | 3/10                       | 30%              |
| [87]      | Smith, 2015                    | Yes                                  | Yes                      | Yes                      | No                                   | No                                            | No                                      | No                                               | No                  | Yes                                  | 22.8%        | N/A                              | N/A                                    | 4/10                       | 40%              |
| [88]      | Tang, 2013                     | Yes                                  | Yes                      | Yes                      | Yes                                  | No                                            | Yes                                     | No                                               | No                  | Yes                                  | 7.5%         | N/A                              | N/A                                    | 7/10                       | 70%              |
| [89]      | Tang, 2015                     | Yes                                  | Yes                      | Yes                      | No                                   | No                                            | No                                      | No                                               | Yes                 | Yes                                  | 10.8%        | Yes                              | Yes                                    | 7/12                       | 58%              |
| [90]      | Van Heurck, 2013               | No                                   | Yes                      | Yes                      | No                                   | No                                            | No                                      | No                                               | No                  | Yes                                  | 42.9%        | No                               | Yes                                    | 4/12                       | 33%              |
| [91]      | Xu, 2012                       | Yes                                  | Yes                      | Yes                      | No                                   | No                                            | No                                      | No                                               | Yes                 | Yes                                  | 39.5%        | Yes                              | Yes                                    | 7/12                       | 58%              |
| Total     | Reporting <sup>4</sup> (of 74) | 48/74                                | 36/74                    | 42/74                    | 29/74                                | 26/74                                         | 27/74                                   | 20/74                                            | 15/74               | 51/54                                | 13/52        | 28/44                            | 26/44                                  | -                          | -                |

#### Abbreviations:

MDR - multidrug-resistant tuberculosis      DST - Drug susceptibility testing      EMB - Ethambutol  
PZA - Pyrazinamide      FQN - Fluoroquinolones      SLI - Second Line Injectable  
AE - adverse event      N/R - Not reported  
N/A - Not applicable

#### Footnotes:

<sup>1</sup> Studies that did not report end of treatment outcomes, they are categorized into “Only AE” (only reported adverse events) or “6-month culture conversion”.

<sup>2</sup> Default rate was considered high if  $\geq 8\%$

<sup>3</sup> The highest total score possible for studies are:

- Only reported 6-month culture conversion: 8
- Only reported end of treatment outcomes: 10
- Only reported AE: 10
- Reported 6-month culture conversion and AE: 10
- Reported end of treatment outcome and AE, or all 3 outcomes: 12

<sup>4</sup> Denominator is for N studies that should have reported (54 studies reported EOT, 43 reported AE, 11 reported 6 month culture conversion)

<sup>5</sup> The studies 45 and 46 reported defaulted mixed with other unsuccessful outcomes.

Supplemental Table S3. Drug susceptibility test results for MDR patients reported in the included studies

| Reference | Author, Year                 | Study participant | Reported XDR | Reported Pre-XDR SLI | Reported Pre-XDR FQN | Median No. of drugs resistant to | Resistant to First line drugs/<br>N of tested |         |         | Resistant to Second line injectable/N of tested |       |       | Resistant to Fluoroquinolones/<br>N of tested |     |     | Resistant to Group 4 drugs/<br>N of tested |       |         |
|-----------|------------------------------|-------------------|--------------|----------------------|----------------------|----------------------------------|-----------------------------------------------|---------|---------|-------------------------------------------------|-------|-------|-----------------------------------------------|-----|-----|--------------------------------------------|-------|---------|
|           |                              |                   |              |                      |                      |                                  | PZA                                           | EMB     | SM      | KM                                              | AM    | CM    | OFX/CFX                                       | MFX | LFX | PAS                                        | CS    | ETO/PTO |
| [18]      | Baghaei, 2011                | 80                | No           | No                   | No                   | NR                               | NR                                            | NR      | NR      | NR                                              | NR    | NR    | NR                                            | NR  | NR  | NR                                         | NR    | NR      |
| [19]      | Bonnet, 2011                 | 68                | 3/67         | No                   | No                   | NR                               | NR                                            | NR      | NR      | 21/67 to any SLI                                |       |       | 3/67                                          | NR  | NR  | NR                                         | NR    | 25/67   |
| [20]      | Brust, 2013                  | 91                | No           | No                   | No                   | NR                               | NR                                            | NR      | NR      | NR                                              | NR    | NR    | NR                                            | NR  | NR  | NR                                         | NR    | NR      |
| [21]      | Brust, 2010                  | 1209              | No           | No                   | No                   | NR                               | NR                                            | NR      | NR      | NR                                              | NR    | NR    | NR                                            | NR  | NR  | NR                                         | NR    | NR      |
| [22]      | Brust, 2012                  | 80                | No           | No                   | No                   | NR                               | NR                                            | NR      | NR      | NR                                              | NR    | NR    | NR                                            | NR  | NR  | NR                                         | NR    | NR      |
| [23]      | Chand, 2014                  | 81                | No           | No                   | No                   | NR                               | NR                                            | 7/81    | 16/81   | NR                                              | NR    | NR    | NR                                            | NR  | NR  | NR                                         | NR    | NR      |
| [24]      | Duraisamy, 2014              | 179               | No           | No                   | No                   | NR                               | NR                                            | NR      | NR      | NR                                              | NR    | NR    | NR                                            | NR  | NR  | NR                                         | NR    | NR      |
| [25]      | Farley, 2011                 | 757               | No           | No                   | No                   | NR                               | NR                                            | 197/290 | NR      | NR                                              | NR    | NR    | NR                                            | NR  | NR  | NR                                         | NR    | NR      |
| [26]      | Ganzaya, 2013 <sup>2</sup>   | 31                | No           | No                   | No                   | NR                               | NR                                            | NR      | NR      | NR                                              | NR    | NR    | NR                                            | NR  | NR  | NR                                         | NR    | NR      |
|           |                              | 31                | No           | No                   | No                   | NR                               | NR                                            | NR      | 31/31   | NR                                              | NR    | NR    | NR                                            | NR  | NR  | NR                                         | NR    | NR      |
|           |                              | 76                | No           | No                   | No                   | NR                               | NR                                            | 76/76   | 76/76   | NR                                              | NR    | NR    | NR                                            | NR  | NR  | NR                                         | NR    | NR      |
| [27]      | Hire, 2014                   | 110               | No           | No                   | No                   | NR                               | NR                                            | NR      | NR      | NR                                              | NR    | NR    | NR                                            | NR  | NR  | NR                                         | NR    | NR      |
| [28]      | Jain, 2014                   | 130               | No           | No                   | No                   | NR                               | NR                                            | 63/130  | 74/130  | NR                                              | NR    | NR    | NR                                            | NR  | NR  | NR                                         | NR    | NR      |
| [29]      | Joseph, 2011                 | 38                | 0/38         | No                   | No                   | NR                               | NR                                            | NR      | NR      | 1/38                                            | NR    | NR    | 5/38                                          | NR  | NR  | NR                                         | NR    | 12/38   |
| [30]      | Malla, 2009                  | 175               | No           | No                   | No                   | NR                               | NR                                            | 139/175 | 159/175 |                                                 | NR    | NR    | NR                                            | NR  | NR  | NR                                         | NR    | NR      |
| [31]      | Modongo, 2014                | 437               | No           | No                   | No                   | NR                               | NR                                            | NR      | NR      | NR                                              | NR    | NR    | NR                                            | NR  | NR  | NR                                         | NR    | NR      |
| [32]      | Mugabo, 2015                 | 363               | No           | No                   | No                   | NR                               | NR                                            | NR      | NR      | NR                                              | NR    | NR    | NR                                            | NR  | NR  | NR                                         | NR    | NR      |
| [33]      | Nagaraja, 2012 <sup>2</sup>  | 146               | No           | No                   | No                   | NR                               | NR                                            | 146/146 | 146/146 | NR                                              | NR    | NR    | NR                                            | NR  | NR  | NR                                         | NR    | NR      |
|           |                              | 39                | No           | No                   | No                   | NR                               | NR                                            | NR      | 39/39   | NR                                              | NR    | NR    | NR                                            | NR  | NR  | NR                                         | NR    | NR      |
|           |                              | 20                | No           | No                   | No                   | NR                               | NR                                            | NR      | NR      | NR                                              | NR    | NR    | NR                                            | NR  | NR  | NR                                         | NR    | NR      |
|           |                              | 19                | No           | No                   | No                   | NR                               | NR                                            | 19/19   | NR      | NR                                              | NR    | NR    | NR                                            | NR  | NR  | NR                                         | NR    | NR      |
|           |                              |                   |              |                      |                      |                                  |                                               |         |         |                                                 |       |       |                                               |     |     |                                            |       |         |
| [34]      | Oladimeji, 2014              | 162               | No           | No                   | No                   | NR                               | NR                                            | NR      | NR      | NR                                              | NR    | NR    | NR                                            | NR  | NR  | NR                                         | NR    | NR      |
| [35]      | Rodriguez, 2013 <sup>2</sup> | 55                | No           | No                   | No                   | NR                               | NR                                            | NR      | NR      | NR                                              | NR    | NR    | NR                                            | NR  | NR  | NR                                         | NR    | NR      |
|           |                              | 50                | No           | No                   | No                   | NR                               | NR                                            | NR      | NR      | NR                                              | NR    | NR    | NR                                            | NR  | NR  | NR                                         | NR    | NR      |
| [36]      | Tabarsi, 2009                | 33                | 0/33         | No                   | No                   | NR                               | NR                                            | NR      | NR      | 8/33                                            | 16/33 | 11/33 | 1/33                                          | NR  | NR  | 7/33                                       | 11/33 | 5/33    |
| [37]      | Tabarsi, 2010                | 51                | 12/51        | No                   | No                   | NR                               | 36/45                                         | 40/50   | NR      | 17/51                                           | 21/49 | 22/51 | 13/51                                         | NR  | NR  | 15/49                                      | 18/51 | 14/51   |
| [38]      | Tabarsi, 2011                | 53                | No           | No                   | No                   | NR                               | NR                                            | NR      | NR      | NR                                              | NR    | NR    | NR                                            | NR  | NR  | NR                                         | NR    | NR      |
| [39]      | Van der Walt, 2013           | 1390              | No           | No                   | No                   | NR                               | NR                                            | NR      | NR      | NR                                              | NR    | NR    | NR                                            | NR  | NR  | NR                                         | NR    | NR      |
| [40]      | Ahmad, 2015                  | 196               | 0/196        | No                   | No                   | 5 (range 2–7)                    | 191/196                                       | 161/196 | 131/196 | 1/196                                           | 1/196 | 2/196 | 108/196                                       | NR  | NR  | NR                                         | NR    | 13/196  |

| Reference | Author, Year                | Study participant | Reported XDR | Reported Pre-XDR SLI | Reported Pre-XDR FQN | Median No. of drugs resistant to | PZA     | EMB      | SM       | KM                | AM       | CM       | OFX/CFX         | MFx    | LFx     | PAS      | CS     | ETO/PTO  |
|-----------|-----------------------------|-------------------|--------------|----------------------|----------------------|----------------------------------|---------|----------|----------|-------------------|----------|----------|-----------------|--------|---------|----------|--------|----------|
| [41]      | Blondal, 2012               | 211               | 43/211       | No                   | No                   | NR                               | NR      | 198/211  | NR       | 17/121 to all SLI |          |          | 47/211          | NR     | NR      | NR       | NR     | 63/211   |
| [42]      | Bloss, 2010                 | 1027              | No           | No                   | No                   | 6 (range 2-12)                   | NR      | NR       | NR       | NR                | NR       | NR       | NR              | NR     | NR      | NR       | NR     | NR       |
| [43, 44]  | Cegielski, 2015; Yuen, 2015 | 1244              | 71/1244      | 109/1244             | 63/1244              | 4 (IQR 3-5)                      | 469/904 | 766/1244 | 815/1244 | 209/1244          | 179/1244 | 136/1244 | 144/1244        | NR     | NR      | 116/1244 | NR     | 230/1244 |
| [45]      | Chan, 2013                  | 651               | No           | No                   | No                   | NR                               | 22/651  | 627/651  | 631/651  | 292/651           | 7/651    | 94/651   | 203/651         | 85/651 | 119/651 | 282/651  | 4/651  | 255/651  |
| [46]      | Chang, 2012                 | 194               | No           | No                   | No                   | NR                               | 71/194  | 80/194   | 139/194  | 23/194 to any SLI |          |          | 35/194          | NR     | NR      | NR       | 10/194 | 24/194   |
| [47]      | Charles, 2014               | 110               | 0/211        | No                   | No                   | 3.8 (SD 1.4) <sup>1</sup>        | 54/107  | 83/107   | 55/107   | 0/107             | NR       | 0/107    | 1/107           | NR     | NR      | 0/107    | 0/107  | 17/107   |
| [48]      | Dawson, 2015                | 26                | No           | No                   | No                   | NR                               | 17/26   | NR       | NR       | NR                | NR       | NR       | NR              | 1/26   | NR      | NR       | NR     | NR       |
| [49]      | Dheda, 2010                 | 174               | 174/174      | No                   | No                   | NR                               | NR      | 62/117   | NR       | 50/50             | 124/124  | 22/42    | 174/174         | NR     | NR      | NR       | NR     | 59/167   |
| [50]      | Diacon, 2014                | 66                | No           | 9/54                 | 6/54                 | NR                               | 38/56   | NR       | NR       | 9/54 to any SLI   |          |          | 6/54 to any FQN |        |         | NR       | NR     | NR       |
|           |                             | 66                | No           | 8/58                 | 4/58                 | NR                               | 33/59   | NR       | NR       | 8/58 to any SLI   |          |          | 4/58 to any FQN |        |         | NR       | NR     | NR       |
| [51]      | El-Din, 2015                | 138               | No           | No                   | No                   | NR                               | NR      | NR       | NR       | NR                | NR       | NR       | NR              | NR     | NR      | NR       | NR     | NR       |
| [52]      | Ferrer, 2010                | 46                | No           | No                   | No                   | 3.75 <sup>1</sup>                | 10/46   | 13/46    | 19/46    | NR                | NR       | NR       | 2/46            | NR     | NR      | NR       | NR     | 11/46    |
| [53]      | Gegia, 2012                 | 380               | 49/380       | No                   | No                   | 5.4 (range 2–10) <sup>1</sup>    | 85/380  | 252/380  | 348/380  | 137/380           | NR       | 89/380   | 84/380          | NR     | NR      | 58/380   | 17/380 | 225/380  |
| [54]      | Guglielmetti, 2015          | 35                | 19/35        | 4/35                 | 10/35                | 9 (range 5-12)                   | 25/35   | 28/35    | 32/35    | 21/35             | 11/35    | 14/35    | 29/35           | 21/35  | NR      | 11/35    | 21/35  | 28/35    |
| [55]      | Hafkin, 2013                | 70                | 2/70         | No                   | No                   | 5 (IQR 5–5)                      |         | 47/70    | 44/66    | 4/34              | NR       | NR       | 5/31            | NR     | NR      | NR       | NR     | 13/34    |
| [56]      | Helbling, 2014              | 51                | 0/51         | No                   | No                   | 4 (range 0–8)                    | 27/50   | 29/51    | 42/51    |                   | 5/50     | 1/34     | 6/46            | 6/28   | 0/4     | 19/37    | 18/36  | 28/49    |
| [57]      | Hicks, 2014                 | 84                | 6/84         | 10/84 pre-XDR        |                      | NR                               | NR      | NR       | NR       | NR                | NR       | NR       | NR              | NR     | NR      | NR       | NR     | NR       |
| [58]      | Jana, 2009                  | 31                | No           | No                   | No                   | NR                               | NR      | NR       | NR       | NR                | NR       | NR       | NR              | NR     | NR      | NR       | NR     |          |
| [59]      | Jiang, 2013 <sup>2</sup>    | 72                | 23/72        | No                   | No                   | 5.6 (SD 1.2) <sup>1</sup>        | NR      | 45/72    | 58/72    | NR                | 22/72    | 38/72    | 46/72           | NR     | NR      | 4/72     | NR     | 1/72     |
|           |                             | 86                | 25/86        | No                   | No                   | 5.5 (SD 1.9) <sup>1</sup>        | NR      | 64/86    | 60/86    | NR                | 24/86    | 26/86    | 52/86           | NR     | NR      | 10/86    | NR     | 3/86     |
| [60]      | Jo, 2014                    | 70                | 26/70        | No                   | No                   | NR                               | 54/70   | 57/70    | 33/70    | 24/70             |          | 14/70    | 70/70           | 48/70  |         | 33/70    | 24/70  | 34/70    |
| [61]      | Karagoz, 2009               | 142               | No           | No                   | No                   | 4 (SD ± 1) <sup>1</sup>          | NR      | NR       | NR       | NR                | NR       | NR       | NR              | NR     | NR      | NR       | NR     | NR       |
| [62]      | Kempker, 2015               | 141               | 0/141        | 47/141               | No                   | 5 (IQR 5–6)                      | NR      | NR       | NR       | NR                | NR       | NR       | 9/141           | NR     | NR      | NR       | NR     | NR       |
| [63]      | Koh, 2013                   | 155               | 3/155        | No                   | No                   | 4 (range 3-5)                    | 47/155  | 91/155   | 48/155   | 10/155            | 6/155    | 8/155    | 3/155           | NR     | NR      | 23/155   | 3/155  | 13/155   |
| [64]      | Kvasnovsky, 2011            | 206               | 206/206      | No                   | No                   | 4.2 (SD 0.5) <sup>1</sup>        | NR      | NR       | NR       | NR                | NR       | NR       | NR              | NR     | NR      | NR       | NR     | NR       |
| [65]      | Kwak, 2015 <sup>2</sup>     | 123               | 26/123       | 33/123               | 13/123               | NR                               | NR      | NR       | NR       | NR                | NR       | NR       | NR              | NR     | NR      | NR       | NR     | NR       |
|           |                             | 86                | No           | No                   | No                   | NR                               | NR      | NR       | NR       | NR                | NR       | NR       | NR              | NR     | NR      | NR       | NR     | NR       |
|           |                             | 125               | No           | No                   | No                   | NR                               | NR      | NR       | NR       | NR                | NR       | NR       | NR              | NR     | NR      | NR       | NR     | NR       |
| [66]      | Laniado-Laborín, 2012       | 42                | 2/42         | No                   | No                   | 4.15 (SD 1.3) <sup>1</sup>       | NR      | NR       | NR       | NR                | NR       | NR       | NR              | NR     | NR      | NR       | NR     | NR       |
| [67]      | Lee, 2011 <sup>2</sup>      | 123               | 10/123       | No                   | No                   | 4 (range 3-5)                    | NR      | NR       | NR       | NR                | NR       | NR       | 18/123          | NR     | NR      | NR       | NR     | NR       |
|           |                             | 48                | 7/48         | No                   | No                   | 5 (range 4-7)                    | NR      | NR       | NR       | NR                | NR       | NR       | 17/48           | NR     | NR      | NR       | NR     | NR       |

| Reference | Author, Year            | Study participant | Reported XDR | Reported Pre-XDR SLI | Reported Pre-XDR FQN | Median No. of drugs resistant to | PZA      | EMB      | SM       | KM                      | AM       | CM       | OFX/CFX           | MFx   | LFX     | PAS                       | CS      | ETO/PTO  |
|-----------|-------------------------|-------------------|--------------|----------------------|----------------------|----------------------------------|----------|----------|----------|-------------------------|----------|----------|-------------------|-------|---------|---------------------------|---------|----------|
| [68]      | Leimane, 2010           | 1027              | 48/1027      | No                   | No                   | NR                               | 705/1027 | 634/1027 | 976/1027 | 437/1027                | NR       | 250/1027 | 66/1027           | NR    | NR      | 281/1027                  | 20/1027 | 262/1027 |
| [69]      | Liu, 2011               | 576               | 48/576       | No                   | No                   | NR                               | 159/576  | 301/576  | 298/576  | 185/576                 | NR       | NR       | 114/576           | NR    | 114/576 | 143/576                   | NR      | NR       |
| [70]      | Marks, 2014             | 135               | 5/134        | 22/134               | pre-XDR              | 5 (range 2-16)                   | 63/134   | 82/134   | 90/131   | 13/114                  | 8/105    | 5/129    | 17/105            | 8/54  | 8/70    | 15/107                    | 5/100   | 36/131   |
| [71]      | Milanov, 2015           | 50                | 8/50         | No                   | No                   | NR                               | NR       | 30/50    | 33/50    | 11/50 to any SLI        |          |          | NR                | NR    | NR      | NR                        | NR      | NR       |
| [72]      | Miller, 2012            | 407               | 20/407       | No                   | No                   | 5                                | NR       | NR       | NR       | NR                      | NR       | NR       | NR                | NR    | NR      | NR                        | NR      | NR       |
| [73]      | Modongo, 2012           | 213               | No           | No                   | No                   | NR                               | NR       | NR       | NR       | NR                      | NR       | NR       | NR                | NR    | NR      | NR                        | NR      | NR       |
| [74]      | Ndjeka, 2015            | 91                | 34/91        | 16/91                | 41/91                | NR                               | NR       | NR       | NR       | NR                      | NR       | NR       | NR                | NR    | NR      | NR                        | NR      | NR       |
| [75]      | O'Donnell, 2013         | 114               | 114/114      | No                   | No                   | NR                               | NR       | NR       | NR       | NR                      | NR       | NR       | NR                | NR    | NR      | NR                        | NR      | NR       |
| [76]      | O'Donnell, 2015         | 216               | 216/216      | No                   | No                   | 5.7 <sup>1</sup>                 | NR       | NR       | NR       | NR                      | NR       | 47/52    | NR                | NR    | NR      | NR                        | NR      | NR       |
| [77]      | Palacios, 2012          | 52                | 0/52         | No                   | No                   | NR                               | 24/47    | 33/50    | 36/50    | 2/25                    | 1/9      | 2/15     | NR                | NR    | NR      | 3/28                      | NR      | 8/26     |
| [78]      | Pazarli, 2013           | 103               | No           | No                   | No                   | NR                               | NR       | NR       | NR       | NR                      | NR       | NR       | NR                | NR    | NR      | NR                        | NR      | NR       |
| [79]      | Pietersen, 2014         | 107               | 107/107      | No                   | No                   | NR                               | 47/56    | 49/56    | NR       | 56/56 to any injectable |          |          | 56/56             | NR    | NR      | 3/48                      | NR      | 39/56    |
| [80]      | Podewils, 2013          | 583               | 22/583       | 2/583                | 186/583              | NR                               | NR       | NR       | NR       | NR                      | NR       | NR       | NR                | NR    | NR      | NR                        | NR      | NR       |
| [81]      | Qazi,2011               | 85                | No           | No                   | No                   | NR                               | 38/85    | 26/85    | 48/85    | 1/85 to any SLI         |          |          | 23/85 to any FQN  |       |         | 2/85 to any group 4 drugs |         |          |
| [82]      | Roberts-Witteveen, 2015 | 44                | 2/55         | No                   | No                   | 5 (range 2-10)                   | 19/55    | 5/55     | 25/55    | 1/55                    | 4/55     | 3/55     | 7/55              | 1/55  | NR      | 3/55                      | 4/55    | 26/55    |
| [83]      | Satti, 2012             | 134               | No           | No                   | No                   | NR                               | NR       | NR       | NR       | NR                      | NR       | NR       | NR                | NR    | NR      | NR                        | NR      | NR       |
| [84]      | Seddon, 2012            | 111               | 5/42         | 3/42                 | 4/42                 | NR                               | NR       | NR       | NR       | NR                      | NR       | NR       | NR                | NR    | NR      | NR                        | NR      | NR       |
| [85]      | Seung, 2014             | 213               | 19/156       | No                   | No                   | NR                               | NR       | NR       | NR       | 78/169 to any SLI       |          |          | 28/157 to any FQN |       |         | NR                        | NR      | NR       |
| [86]      | Shean, 2013             | 115               | 115/115      | No                   | No                   | NR                               | NR       | NR       | NR       | NR                      | NR       | NR       | NR                | NR    | NR      | NR                        | NR      | NR       |
| [87]      | Skripconoka, 2013       | 202               | 7/171        | No                   | No                   | NR                               | NR       | 135/171  | 163/171  | 72/171                  | 30/171   | 13/171   | 10/171            | NR    | NR      | 54/171                    | NR      | 46/171   |
| [88]      | Tang, 2013              | 586               | 169/586      | No                   | No                   | NR                               | NR       | 472/586  | 472/586  | NR                      | 174/ 586 | 182/586  | 406/586           | NR    | NR      | NR                        | NR      | NR       |
| [89]      | Tang, 2015              | 65                | 65/65        | No                   | No                   | NR                               | NR       | 59/65    | 60/65    | NR                      | 51/65    | 50/65    | 65/65             | NR    | NR      | NR                        | NR      | NR       |
| [90]      | Van Heurck, 2013        | 78                | 11/84        | No                   | No                   | 6.5 (IQR 4.5-9)                  | 54/84    | 56/84    | 52/84    | NR                      | 24/84    | 10/84    | 21/84             | 12/84 | NR      | 28/84                     | 9/84    | 24/84    |
| [91]      | Xu, 2012                | 39                | 19/39        | No                   | No                   | 6 (range 2-11)                   | NR       | 30/39    | 33/39    | NR                      | 17/39    | 18/39    | 31/39             | NR    | NR      | 3/39                      | NR      | NR       |

Abbreviations:

|                                  |                              |                                     |                   |
|----------------------------------|------------------------------|-------------------------------------|-------------------|
| XDR - Extensively drug resistant | SLI - Second Line Injectable | FQN - Fluoroquinolones              | NR - Not reported |
| PZA - Pyrazinamide               | EMB - Ethambutol             | SM - Streptomycin                   |                   |
| KM - Kanamycin                   | AM - Amikacin                | CM - Capreomycin                    |                   |
| OFX - Ofloxacin                  | MXF - Moxifloxacin           | LFX - Levofloxacin                  |                   |
| PAS - Para- aminosalicylic acid  | CS - Cycloserine             | ETO/PTO - Ethionamide/Prothionamide |                   |

Footnotes

- <sup>1</sup> Mean reported
- <sup>2</sup> Studies 26, 33, 35, 50, 59, 65, 67 reported more than one cohort

Supplemental Table S4. Treatment regimens reported in the included studies

|           | Treatment duration           |                   |                              |      |                   |                |                          | First line drugs used          |                     |        | Second line injectable used |        | Fluoroquinolones used |                        |         |        | Group 4 drugs used |         |           | Group 5 drugs used |               |        |
|-----------|------------------------------|-------------------|------------------------------|------|-------------------|----------------|--------------------------|--------------------------------|---------------------|--------|-----------------------------|--------|-----------------------|------------------------|---------|--------|--------------------|---------|-----------|--------------------|---------------|--------|
| Reference | Author, Year                 | Study participant | Standardized/ Individualized | DOT? | No. of drugs used | Total duration | Intensive phase duration | PZA                            | EMB                 | SM     | KM/AM                       | CM     | OFX/ CFX              | MFX                    | LFX     | GATI   | PAS                | CS/TZD  | ETO/ PTO  | Any Group 5        | High-dose INH | BDQ    |
| [18]      | Baghaei, 2011                | 80                | Standardized                 | Yes  | 6                 | ≥ 18           | ≥ 6                      | Used if susceptible            | Used if susceptible | 0/80   | 80/80                       | 0/80   | 80/80                 | 0/80                   | 0/80    | 0/80   | 0/80               | 80/80   | 80/80     | 0/80               | 0/80          | 0/80   |
| [19]      | Bonnet, 2011                 | 68                | Standardized                 | Yes  | 5                 | NR             | ≥ 6                      | 0/68                           | 0/68                | 0/68   | 0/68                        | 68/68  | 68/68                 | Used either OFX or MFX | 0/68    | 68/68  | 68/68              | 68/68   | 68/68     | 0/68               | 0/68          | 0/68   |
| [20]      | Brust, 2013                  | 91                | Standardized                 | Yes  | 6                 | 24             | ≥ 6                      | 91/91                          | 91/91               | 0/91   | 91/91                       | 0/91   | 91/91                 | 0/91                   | 0/91    | 0/91   | 0/91               | 91/91   | 91/91     | 0/91               | 0/91          | 0/91   |
| [21]      | Brust, 2010                  | 1209              | Standardized                 | Yes  | 5                 | NR             | 4-6                      | 1209/1209                      | Used if susceptible | 0/1209 | 1209/1209                   | 0/1209 | 1209/1209             | 0/1209                 | 0/1209  | 0/1209 | 0/1209             | Used    | 1209/1209 | 0/1209             | 0/1209        | 0/1209 |
| [22]      | Brust, 2012                  | 80                | Standardized                 | Yes  | 5-6               | 24             | 6                        | 80/80                          | Used if susceptible | 0/80   | 80/80                       | 0/80   | 80/80                 | 0/80                   | 0/80    | 0/80   | 0/80               | 80/80   | 80/80     | 0/80               | 0/80          | 0/80   |
| [23]      | Chand, 2014                  | 81                | Standardized                 | No   | 6                 | NR             | 6-9                      | 81/81                          | 81/81               | 0/81   | 81/81                       | 0/81   | 0/81                  | 0/81                   | 81/81   | 0/81   | 0/81               | 81/81   | 81/81     | 0/81               | 0/81          | 0/81   |
| [24]      | Duraisamy, 2014              | 179               | Standardized                 | Yes  | 6                 | 24             | 6                        | 179/179                        | 179/179             | 0/179  | 179/179                     | 0/179  | 0/179                 | 0/179                  | 179/179 | 0/179  | 0/179              | 179/179 | 179/179   | 0/179              | 0/179         | 0/179  |
| [25]      | Farley, 2011                 | 757               | Standardized                 | Yes  | 5                 | 16-24          | 4-6                      | 757/757                        | 757/757             | 0/757  | 757/757 used any SLI        |        | 757/757               | 0/757                  | 0/757   | 0/757  | 0/757              | 0/757   | 757/757   | 0/757              | 0/757         | 0/757  |
| [26]      | Ganzaya, 2013 <sup>2</sup>   | 31                | Standardized                 | NR   | 6                 | ≥ 18           | NR                       | 31/31                          | 31/31               | 31/31  | 31/31                       | 0/31   | 31/31                 | 0/31                   | 0/31    | 0/31   | 0/31               | 0/31    | 31/31     | 0/31               | 0/31          | 0/31   |
|           |                              | 31                | Standardized                 | NR   | 6                 | ≥ 18           | NR                       | 31/31                          | 31/31               | 0/31   | 31/31                       | 0/31   | 31/31                 | 0/31                   | 0/31    | 0/31   | 0/31               | 31/31   | 31/31     | 0/31               | 0/31          | 0/31   |
|           |                              | 76                | Standardized                 | NR   | 5                 | ≥ 18           | NR                       | 76/76                          | 0/76                | 0/76   | 76/76                       | 0/76   | 76/76                 | 0/76                   | 0/76    | 0/76   | 0/76               | 76/76   | 76/76     | 0/76               | 0/76          | 0/76   |
| [27]      | Hire, 2014                   | 110               | Standardized                 | Yes  | 6                 | NR             | NR                       | 110/110                        | 110/110             | 0/110  | 110/110                     | 0/110  | 0/110                 | 0/110                  | 110/110 | 0/110  | 0/110              | 110/110 | 110/110   | 0/110              | 0/110         | 0/110  |
| [28]      | Jain, 2014                   | 130               | Standardized                 | Yes  | 6                 | NR             | 6-9                      | 130/130                        | 130/130             | 0/130  | 130/130                     | 0/130  | 130/130               | 0/130                  | 0/130   | 0/130  | 0/130              | 130/130 | 130/130   | 0/130              | 0/130         | 0/130  |
| [29]      | Joseph, 2011                 | 38                | Standardized                 | Yes  | 6                 | NR             | 6-9                      | 38/38                          | 38/38               | 0/38   | 38/38                       | 0/38   | 38/38                 | 0/38                   | 0/38    | 0/38   | 0/38               | 38/38   | 38/38     | 0/38               | 0/38          | 0/38   |
| [30]      | Malla, 2009                  | 175               | Standardized                 | Yes  | 5                 | NR             | 8-12                     | 175/175                        | 0/175               | 0/175  | 175/175                     | 0/175  | 175/175               | 0/175                  | 0/175   | 0/175  | 0/175              | 175/175 | 175/175   | 0/175              | 0/175         | 0/175  |
| [31]      | Modongo, 2014                | 437               | Standardized                 | Yes  | 5                 | ≥ 18           | NR                       | 437/437                        | 0/437               | 0/437  | 437/437                     | 0/437  | 0/437                 | 0/437                  | 437/437 | 0/437  | 0/437              | 437/437 | 437/437   | 0/437              | 0/437         | 0/437  |
| [32]      | Mugabo, 2015                 | 363               | Standardized                 | Yes  | 6                 | NR             | NR                       | 363/363                        | 360/363             | 0/363  | 336/363                     | 0/363  | 362/363               | 0/363                  | 0/363   | 0/363  | 0/363              | 336/363 | 336/363   | 0/363              | 0/363         | 0/363  |
| [33]      | Nagaraja, 2012 <sup>2</sup>  | 146               | Standardized                 | NR   | 6                 | 18-24          | NR                       | 146/146                        | 0/146               | 0/146  | 146/146                     | 0/146  | 146/146               | Used either OFX or LFX |         | 0/146  | 146/146            | 146/146 | 146/146   | 0/146              | 0/146         | 0/146  |
|           |                              | 39                | Standardized                 | NR   | 5                 | 18-24          | NR                       | 39/39                          | 39/39               | 0/39   | 39/39                       | 0/39   | 39/39                 | Used either OFX or LFX |         | 0/39   | 0/39               | 0/39    | 39/39     | 0/39               | 0/39          | 0/39   |
|           |                              | 20                | Standardized                 | NR   | 5                 | 18-24          | NR                       | 20/20                          | 20/20               | 20/20  | 0/20                        | 0/20   | 20/20                 | Used either OFX or LFX |         | 0/20   | 0/20               | 0/20    | 20/20     | 0/20               | 0/20          | 0/20   |
|           |                              | 19                | Standardized                 | NR   | 5                 | 18-24          | NR                       | 19/19                          | 0/19                | 19/19  | 0/19                        | 0/19   | 19/19                 | Used either OFX or LFX |         | 0/19   | Used               | Used    | 19/19     | 0/19               | 0/19          | 0/19   |
| [34]      | Oladimeji, 2014              | 162               | Standardized                 | Yes  | 5                 | NR             | 6-8                      | 162/162                        | 0/162               | 0/162  | 162/162 used any SLI        |        | 0/162                 | 0/162                  | 162/162 | 0/162  | 0/162              | 162/162 | 162/162   | 0/162              | 0/162         | 0/162  |
| [35]      | Rodriguez, 2013 <sup>2</sup> | 55                | Standardized                 | Yes  | 5                 | 18–24          | ≥ 6                      | 55/55                          | 0/55                | 0/55   | 55/55 used any SLI          |        | 55/55                 | Used either OFX or LFX |         | 0/55   | 0/55               | 55/55   | 55/55     | 0/55               | 0/55          | 0/55   |
|           |                              | 50                | Standardized                 | Yes  | 5                 | 18–24          | ≥ 6                      | 50/50                          | 50/50               | 0/50   | 50/50 used any SLI          |        | 50/50                 | Used either OFX or LFX |         | 0/50   | 0/50               | 50/50   | 50/50     | 0/50               | 0/50          | 0/50   |
| [36]      | Tabarsi, 2009                | 33                | Standardized                 | NR   | ≥ 4               | 24             | ≥ 6                      | First-line used if susceptible |                     |        | 33/33                       | 0/33   | 33/33                 | 0/33                   | 0/33    | 0/33   | 0/33               | 33/33   | 33/33     | 0/33               | 0/33          | 0/33   |
| [37]      | Tabarsi, 2010                | 51                | Standardized                 | Yes  | 4                 | 24             | ≥ 6                      | First-line used if susceptible |                     |        | 51/51                       | 0/51   | 51/51                 | 0/51                   | 0/51    | 0/51   | 0/51               | 51/51   | 51/51     | 0/51               | 0/51          | 0/51   |

| Reference | Author, Year                | Study participant | Standardized/ Individualized | DOT? | No. of drugs used          | Total duration             | Intensive phase duration | PZA       | EMB                 | SM      | KM/AM     | CM           | OFX/ CFX  | MFX                                   | LFX                    | GATI   | PAS      | CS/TZD                | ETO/ PTO  | Any Group 5 | High-dose INH | BDQ    |
|-----------|-----------------------------|-------------------|------------------------------|------|----------------------------|----------------------------|--------------------------|-----------|---------------------|---------|-----------|--------------|-----------|---------------------------------------|------------------------|--------|----------|-----------------------|-----------|-------------|---------------|--------|
| [38]      | Tabarsi, 2011               | 53                | Standardized                 | Yes  | 4                          | NR                         | NR                       | 0/53      | 0/53                | 0/53    | 53/53     | 0/53         | 53/53     | 0/53                                  | 0/53                   | 0/53   | 0/53     | 53/53                 | 53/53     | 0/53        | 0/53          | 0/53   |
| [39]      | Van der Walt, 2013          | 1390              | Standardized                 | Yes  | 5                          | 16-22                      | 4                        | 1390/1390 | Used if susceptible | 0/1390  | 1390/1390 | used any SLI | 1390/1390 | 0/1390                                | 0/1390                 | 0/1390 | 0/1390   | Used if EMB resistant | 1390/1390 | 0/1390      | 0/1390        | 0/1390 |
| [40]      | Ahmad, 2015                 | 196               | Individualized               | Yes  | 6 (5–8)                    | 24 (range 20–34)           | ≥ 8                      | 196/196   | 0/196               | 0/196   | 196/196   | used any SLI | 0/196     | 0/196                                 | 196/196                | 0/196  | 94/196   | 196/196               | 196/196   | 0/196       | 0/196         | 0/196  |
| [41]      | Blondal, 2012               | 211               | Individualized               | NR   | 6 (4–8)                    | 19.8 (range 6.1–53.7)      | NR                       | 177/211   | 0/211               | 0/211   | 182/211   | used any SLI | 0/211     | 0/211                                 | 0/211                  | 0/211  | 157/211  | 187/211               | 170/211   | 167/211     | 0/211         | 0/211  |
| [42]      | Bloss, 2010                 | 1027              | Individualized               | Yes  | 6 (range 3-8) <sup>1</sup> | 18.3 (range 0.7-46.5)      | NR                       | 560/1027  | 451/1027            | 42/1027 | 539/1027  | 636/1027     | 1027/1027 | 0/1027                                | 0/1027                 | 0/1027 | 686/1027 | 870/1027              | 871/1027  | 761/1027    | 0/1027        | 0/1027 |
| [43, 44]  | Cegielski, 2015; Yuen, 2015 | 1244              | Individualized               | Yes  | 5 (IQR 5-6)                | NR                         | 7 (IQR 4.7-10.4)         | 643/1244  | 406/1244            | 21/1244 | 884/1244  | 282/1244     | 952/1244  | 274/1244                              | 75/1244                | 0/1244 | 662/1244 | 0/1244                | 993/1244  | 0/1244      | 0/1244        | 0/1244 |
| [45]      | Chan, 2013                  | 651               | Individualized               | Yes  | NR                         | 20.7-25.5                  | NR                       | 452/651   | 423/651             | 281/651 | 188/651   | 1/651        | 46/651    | 239/651                               | 302/651                | 0/651  | 294/651  | 147/651               | 439/651   | 2/651       | 0/651         | 0/651  |
| [46]      | Chang, 2012                 | 194               | Individualized               | No   | NR                         | NR                         | NR                       | 107/194   | 106/194             | 37/194  | 125/194   | used any SLI | 0/194     | 0/194                                 | 0/194                  | 0/194  | 95/194   | 0/194                 | 164/194   | 4/194       | 0/194         | 0/194  |
| [47]      | Charles, 2014               | 110               | Individualized               | Yes  | NR                         | 17.8 (IQR 10.3–24.0)       | NR                       | 106/110   | 0/110               | 0/110   | 96/110    | 14/110       | 0/110     | 14/110                                | 86/110                 | 0/110  | 64/110   | 108/110               | 0/110     | 2/110       | 44/110        | 0/110  |
| [48]      | Dawson, 2015                | 26                | Individualized               | Yes  | NR                         | NR                         | NR                       | Used      | 0/26                | 0/26    | 0/26      | 0/26         | 0/26      | Used                                  | 0/26                   | 0/26   | 0/26     | 0/26                  | 0/26      | 0/26        | 0/26          | 0/26   |
| [49]      | Dheda, 2010                 | 174               | Individualized               | Yes  | 7 (IQR 6–8)                | NR                         | NR                       | 140/174   | 103/174             | 1/174   | 7/174     | 162/174      | 31/174    | 14/174                                | 0/174                  | 0/174  | 156/174  | 147/174               | 107/174   | 77/174      | 0/174         | 0/174  |
| [50]      | Diacon, 2014                | 66                | Individualized               | NR   | 6                          | 18-24                      | NR                       | 65/66     | 46/66               | 0/66    | 64/66     | used any SLI | 66/66     | 0/66                                  | 0/66                   | 0/66   | 0/66     | 25/66                 | 65/66     | Used        | 0/66          | 66/66  |
| [51]      | El-Din, 2015                | 138               | Individualized               | NR   | 5                          | NR                         | NR                       | 3/138     | 25/138              | 5/138   | 115/138   | 18/138       | 138/138   | 0/138                                 | 0/138                  | 0/138  | 137/138  | 136/138               | 137/138   | 0/138       | 0/138         | 0/138  |
| [52]      | Ferrer, 2010                | 46                | Individualized               | Yes  | 5 (range 4–7)              | 14 (range 1–27)            | NR                       | 20/46     | 20/46               | 5/46    | 32/46     | 31/46        | 21/46     | 0/46                                  | 20/46                  | 0/46   | 1/46     | 31/46                 | 20/46     | 1/46        | 0/46          | 0/46   |
| [53]      | Gegia, 2012                 | 380               | Individualized               | Yes  | NR                         | ≥ 18                       | NR                       | 0/380     | 0/380               | 0/380   | 380/380   | used any SLI | 0/380     | 380/380                               | used either MFX or LFX | 0/110  | 64/110   | 108/110               | 0/110     | 2/110       | 0/110         | 0/110  |
| [54]      | Guglielmetti, 2015          | 35                | Individualized               | Yes  | 5 (range 3-6)              | NR                         | NR                       | 10/35     | 11/35               | 0/35    | 25/35     | 0/35         | 16/35     | used any FQN                          |                        |        | 26/35    | 19/35                 | 11/35     | 23/35       | 0/35          | 35/35  |
| [55]      | Hafkin, 2013                | 70                | Individualized               | Yes  | 4 (IQR 4–4)                | NR                         | NR                       | 67/70     | 20/70               | 3/70    | 55/70     | 5/70         | 65/70     | 5/70                                  | 0/70                   | 0/70   | 5/70     | 48/70                 | 0/70      | 8/70        | 0/70          | 0/70   |
| [56]      | Helbling, 2014              | 51                | Individualized               | NR   | NR                         | 18 (range 1-26)            | NR                       | 30/51     | 35/51               | 7/51    | 35/51     | 3/51         | 48/51     | used any FQN, among which 39 used MFX |                        |        | 0/51     | 11/51                 | 25/51     | 18/51       | 0/51          | 0/51   |
| [57]      | Hicks, 2014                 | 84                | Individualized               | Yes  | 6 (IQR 5–7)                | 22.1 (IQR 18.6-24.3)       | ≥ 6                      | 84/84     | 58/84               | 0/84    | 74/84     | 12/84        | 73/84     | 17/84                                 | 0/84                   | 0/84   | 14/84    | 78/84                 | 84/84     | 16/84       | 0/84          | 0/84   |
| [58]      | Jana, 2009                  | 31                | Individualized               | Yes  | 5.65 (SD 1.9) <sup>1</sup> | NR                         | NR                       | 14/31     | 22/31               | 7/31    | 18/31     | 5/31         | 16/31     | 0/31                                  | 3/31                   | 0/31   | 18/31    | 10/31                 | 19/31     | 13/31       | 0/31          | 0/31   |
| [59]      | Jiang, 2013 <sup>2</sup>    | 72                | Individualized               | NR   | 6.4 (SD 1.1) <sup>1</sup>  | 17.2 (SD 3.8) <sup>1</sup> | NR                       | 51/72     | 22/72               | 0/72    | 27/72     | 47/72        | 0/72      | 0/72                                  | 0/72                   | 0/72   | 55/72    | 0/72                  | 62/72     | 24/72       | 0/72          | 0/72   |
|           |                             | 86                | Individualized               | NR   | 6.3 (SD 1.2) <sup>1</sup>  | 16.9 (SD 5.1) <sup>1</sup> | NR                       | 59/86     | 6/86                | 0/86    | 25/86     | 65/86        | 0/86      | 0/86                                  | 0/86                   | 0/86   | 71/86    | 0/86                  | 71/86     | 27/86       | 0/86          | 0/86   |
| [60]      | Jo, 2014                    | 70                | Individualized               | NR   | 5 (range 2–8)              | 21.3 <sup>1</sup>          | NR                       | 0/70      | 0/70                | 0/70    | 0/70      | 0/70         | 0/70      | 40/70                                 | 11/70                  | 3/70   | 0/70     | 0/70                  | 0/70      | 26/70       | 0/70          | 0/70   |
| [61]      | Karagoz, 2009               | 142               | Individualized               | Yes  | 5.5 (SD 0.8) <sup>1</sup>  | 18-24                      | NR                       | 47/142    | 24/142              | 5/142   | 126/142   | 6/142        | 125/142   | 0/142                                 | 0/142                  | 0/142  | 15/142   | 122/142               | 121/142   | 21/142      | 0/142         | 0/142  |

| Reference | Author, Year            | Study participant | Standardized/ Individualized | DOT? | No. of drugs used         | Total duration        | Intensive phase duration | PZA     | EMB     | SM                          | KM/AM                | CM       | OFX/ CFX                                             | MFx                          | LFx            | GATI   | PAS      | CS/TZD   | ETO/ PTO | Any Group 5 | High-dose INH | BDQ    |       |
|-----------|-------------------------|-------------------|------------------------------|------|---------------------------|-----------------------|--------------------------|---------|---------|-----------------------------|----------------------|----------|------------------------------------------------------|------------------------------|----------------|--------|----------|----------|----------|-------------|---------------|--------|-------|
| [61]      | Karagoz, 2009           | 142               | Individualized               | Yes  | 5.5 (SD 0.8) <sup>1</sup> | 18-24                 | NR                       | 47/142  | 24/142  | 5/142                       | 126/142              | 6/142    | 125/142                                              | 0/142                        | 0/142          | 0/142  | 15/142   | 122/142  | 121/142  | 21/142      | 0/142         | 0/142  |       |
| [62]      | Kempker, 2015           | 141               | Individualized               | Yes  | ≥ 4                       | NR                    | ≥ 6                      | 139/141 | 0/141   | 0/141                       | 82/141               | 65/141   | 0/141                                                | 0/141                        | 134/141        | 0/141  | 140/141  | 135/141  | 141/141  | 0/141       | 0/141         | 0/141  |       |
| [63]      | Koh, 2013               | 155               | Individualized               | Yes  | 5 (IQR 5-6)               | NR                    | NR                       | 115/155 | 15/155  | 44/155                      | 97/155               | 0/155    | 0/155                                                | 77/155                       | 78/155         | 0/155  | 64/155   | 143/155  | 129/155  | 4/155       | 0/155         | 0/155  |       |
| [64]      | Kvasnovsky, 2011        | 206               | Individualized               | NR   | 5.2 (SD 0.7)              | NR                    | NR                       | 200/206 | 190/206 | 0/206                       | 0/206                | 200/206  | 0/206                                                | 0/206                        | 0/206          | 0/206  | 170/206  | 90/206   | 145/206  | 0/206       | 0/206         | 0/206  |       |
| [65]      | Kwak, 2015 <sup>2</sup> | 123               | Individualized               | NR   | 5.0 (IQR 5–6)             | 24.4 (IQR 18.4–27.3)  | NR                       | 61/123  | 0/123   | 56/123                      | 37/123               | 1/123    | 0/123                                                | 113/123                      | used later FQN |        |          | 89/123   | 109/123  | 94/123      | 12/123        | 0/123  | 0/123 |
|           |                         | 86                | Individualized               | NR   | 6.0 (IQR 5–8)             | 41.5 (IQR 25.0–72.3)  | NR                       | 52/86   | 0/86    | 99/125 used any injectable  |                      |          | 108/125 used any FQN, among which 103 used later FQN |                              |                | 92/125 | 113/125  | 100/125  | 3/125    | 0/86        | 0/86          |        |       |
|           |                         | 125               | Individualized               | NR   | 6.0 (IQR 5–7)             | 31.5 (IQR 25.0–50.0)  | NR                       | 56/86   | 0/86    | 99/125 used any injectable  |                      |          | 108/125 used any FQN, among which 103 used later FQN |                              |                | 92/125 | 113/125  | 100/125  | 3/125    | 0/86        | 0/86          |        |       |
| [66]      | Laniado-Laborin, 2012   | 42                | Individualized               | Yes  | 5                         | NR                    | NR                       | Used    | Used    | 42/42 used any injectable   |                      |          | 0/42                                                 | 42/42 used either MFx or LFX |                |        | 0/42     | Used     | Used     | Used        | Used          | 0/42   | 0/42  |
| [67]      | Lee, 2011 <sup>2</sup>  | 123               | Individualized               | NR   | 5 (range 4-6)             | 19.8 (IQR 16.0-25.7)  | NR                       | Used    | 54/123  | 123/123 used any injectable |                      |          | 0/123                                                | 0/123                        | 123/123        | 0/123  | Used     | Used     | Used     | 30/123      | 0/123         | 0/123  |       |
|           |                         | 48                | Individualized               | NR   | 5 (range 4-6)             | 22.4 (IQR 17.7-25.9)  | NR                       | Used    | 11/48   | 48/48 used any injectable   |                      |          | 0/48                                                 | 48/48                        | 0/48           | 0/48   | Used     | Used     | Used     | 22/48       | 0/48          | 0/48   |       |
| [68]      | Leimane, 2010           | 1027              | Individualized               | Yes  | 6 (IQR 5–7)               | 18.3 (IQR 12.2–21.4)  | NR                       | 0/1207  | 0/1207  | 0/1207                      | 522/1027             | 486/1027 | 982/1027                                             | 6/1027                       | 0/1207         | 0/1207 | 558/1027 | 902/1027 | 791/1027 | 680/1027    | 0/1207        | 0/1207 |       |
| [69]      | Liu, 2011               | 576               | Individualized               | Yes  | NR                        | 21.9 (IQR 21.1–22.6)  | NR                       | 498/576 | 357/576 | 98/576                      | 171/576              | 6/576    | 92/576                                               | 26/576                       | 240/576        | 0/576  | 295/576  | 0/576    | 0/576    | 373/576     | 0/576         | 0/576  |       |
| [70]      | Marks, 2014             | 135               | Individualized               | Yes  | 5                         | 20-32                 | NR                       | 123/134 | 122/134 | 17/134                      | 60/134               | 76/134   | 1/134                                                | 88/134                       | 72/134         | 1/134  | 82/134   | 96/134   | 78/134   | 50/134      | 0/134         | 0/134  |       |
| [71]      | Milanov, 2015           | 50                | Individualized               | Yes  | 6 (range 5-7)             | ≥ 18                  | ≥ 6                      | 50/50   | Used    | 0/50                        | 50/50 used any SLI   |          | 0/50                                                 | 0/50                         | Used           | 0/50   | Used     | Used     | Used     | 0/50        | 0/50          | 0/50   |       |
| [72]      | Miller, 2012            | 407               | Individualized               | Yes  | ≥ 5                       | NR                    | NR                       | 325/407 | 113/407 | 0/407                       | 157/407              | 241/407  | 399/407                                              | 3/407                        | 0/407          | 0/407  | 351/407  | 398/407  | 0/407    | 16/407      | 0/407         | 0/407  |       |
| [73]      | Modongo, 2012           | 213               | Individualized               | NR   | NR                        | NR                    | NR                       | 0213    | 0/231   | Used                        | Used                 | Used     | Used                                                 | Used                         | Used           | Used   | 16/213   | Used     | 49/213   | 0/231       | 0/231         | 0/231  |       |
| [74]      | Ndjeka, 2015            | 91                | Individualized               | NR   | NR                        | NR                    | NR                       | Used    | Used    | 0/91                        | Used                 | Used     | 0/91                                                 | 0/91                         | 76/91          | 0/91   | Used     | Used     | Used     | 68/91       | Used          | 91/91  |       |
| [75]      | O'Donnell, 2013         | 114               | Individualized               | Yes  | 6 (IQR 5-7)               | NR                    | NR                       | 105/114 | 111/114 | 0/114                       | 0/114                | 103/114  | 0/114                                                | 1/114                        | 0/114          | 0/114  | 103/114  | 109/114  | 105/114  | 0/114       | 0/114         | 0/114  |       |
| [76]      | O'Donnell, 2015         | 216               | Individualized               | NR   | 5                         | NR                    | NR                       | 182/216 | 180/216 | 0/216                       | 38/216               | 156/216  | 32/216                                               | 44/216                       | 0/216          | 0/216  | 158/216  | 170/216  | 175/216  | 10/216      | 0/216         | 0/216  |       |
| [77]      | Palacios, 2012          | 52                | Individualized               | Yes  | NR                        | 18-24                 | NR                       | 31/52   | 29/52   | 2/52                        | 36/52                | 14/52    | 52/52 used any FQN                                   |                              |                | 43/52  | 47/52    | 44/52    | 0/52     | 0/52        | 0/52          |        |       |
| [78]      | Pazarli, 2013           | 103               | Individualized               | NR   | NR                        | 18-24                 | NR                       | Used    | Used    | 0/103                       | 103/103 used any SLI |          | 103/103                                              | 0/103                        | 0/103          | 0/103  | 0/103    | Used     | Used     | Used        | 0/103         | 0/103  |       |
| [79]      | Pietersen, 2014         | 107               | Individualized               | Yes  | 8 (IQR 6–10)              | 22.1 (range 8.8–34.3) | NR                       | 83/107  | 48/107  | 1/107                       | 4/107                | 98/107   | 47/107                                               | 24/107                       | 0/107          | 0/107  | 96/107   | 100/107  | 68/107   | 80/107      | 0/107         | 0/107  |       |
| [80]      | Podewils, 2013          | 583               | Individualized               | Yes  | NR                        | 18                    | 6                        | 352/583 | 83/583  | 203/383                     | 385/583              | 38/583   | 301/583                                              | 185/583                      | 26/583         | 0/583  | 320/583  | 505/583  | 425/583  | 0/583       | 0/583         | 0/583  |       |
| [81]      | Qazi, 2011              | 85                | Individualized               | Yes  | NR                        | NR                    | NR                       | 0/85    | 0/85    | 0/85                        | 85/85                | 0/85     | 63/85                                                | 21/85                        | 0/85           | 0/85   | 81/85    | 78/85    | 85/85    | 0/85        | 0/85          | 0/85   |       |
| [82]      | Roberts-Witteveen, 2015 | 44                | Individualized               | Yes  | 7 (range 3–10)            | 22 (range 15–37)      | NR                       | 37/55   | 54/55   | 1/55                        | 38/55                | 20/55    | 11/55                                                | 42/55                        | 2/55           | 0/55   | 9/55     | 28/55    | 22/55    | 24/55       | 0/55          | 0/55   |       |

| Reference | Author, Year     | Study participant | Standardized/ Individualized | DOT? | No. of drugs used | Total duration         | Intensive phase duration | PZA     | EMB    | SM     | KM/AM                | CM      | OFX/ CFX           | MFX                      | LFX    | GATI  | PAS     | CS/TZD  | ETO/ PTO | Any Group 5 | High-dose INH | BDQ   |
|-----------|------------------|-------------------|------------------------------|------|-------------------|------------------------|--------------------------|---------|--------|--------|----------------------|---------|--------------------|--------------------------|--------|-------|---------|---------|----------|-------------|---------------|-------|
| [83]      | Satti, 2012      | 134               | Individualized               | Yes  | NR                | 22.9 (IQR, 21.6–24.0)  | NR                       | 128/134 | 2/134  | 0/134  | 104/134              | 30/134  | 63/134             | 14/134                   | 57/134 | 0/134 | 129/134 | 135/134 | 133/134  | 0/134       | 0/134         | 0/134 |
| [83]      | Satti, 2012      | 134               | Individualized               | Yes  | NR                | 22.9 (IQR, 21.6–24.0)  | NR                       | 128/134 | 2/134  | 0/134  | 104/134              | 30/134  | 63/134             | 14/134                   | 57/134 | 0/134 | 129/134 | 135/134 | 133/134  | 0/134       | 0/134         | 0/134 |
| [84]      | Seddon, 2012     | 111               | Individualized               | Yes  | 7.0 (range 4-13)  | 18 (range 8–26)        | 6 (0–18)                 | 81/88   | 82/88  | 1/88   | 80/88                | 6/88    | 86/88              | 0/88                     | 0/88   | 0/88  | 7/88    | 57/88   | 86/88    | 7/88        | 0/88          | 0/88  |
| [85]      | Seung, 2014      | 213               | Individualized               | Yes  | 9.0 (range 5-13)  | NR                     | NR                       | 92/213  | 70/213 | 32/213 | 114/213              | 109/213 | 193/213            | 108/213                  | 9/213  | 0/213 | 191/213 | 205/213 | 178/213  | 120/213     | 0/213         | 0/213 |
| [86]      | Shean, 2013      | 115               | Individualized               | Yes  | NR                | NR                     | NR                       | 80/115  | 46/115 | 0/115  | 7/115                | 104/115 | 29/115             | 2/115                    | 0/115  | 0/115 | 101/115 | 104/115 | 66/115   | 77/115      | 0/115         | 0/115 |
| [87]      | Smith, 2015      | 171               | Individualized               | Yes  | NR                | NR                     | NR                       | 0/171   | 0/171  | 0/171  | 0/171                | 104/171 | 135/171            | 31/171                   | 0/171  | 0/171 | 0/171   | 0/171   | 0/171    | 79/171      | 0/171         | 0/171 |
| [88]      | Tang, 2013       | 586               | Individualized               | Yes  | NR                | 24                     | NR                       | Used    | Used   | Used   | 586/586 used any SLI |         |                    | 586/586 used any FQN     |        |       | Used    | Used    | Used     | Used        | 0/586         | 0/586 |
| [89]      | Tang, 2015       | 65                | Individualized               | Yes  | ≥ 5.0             | 24                     | NR                       | 65/65   | 0/65   | 0/65   | 35/65 used any SLI   |         | 0/65               | 65/65 used any later FQN |        |       | 65/65   | 0/65    | 65/65    | 42/65       | 0/65          | 0/65  |
| [90]      | Van Heurck, 2013 | 78                | Individualized               | NR   | NR                | 14.9 (range 11.0-20.5) | NR                       | NR      | NR     | NR     | NR                   | NR      | 76/84 used any FQN |                          |        |       | NR      | NR      | NR       | NR          | NR            | NR    |
| [91]      | Xu, 2012         | 39                | Individualized               | Yes  | 7.0 (range 5-8)   | NR                     | NR                       | 30/39   | 6/39   | 0/39   | 12/39                | 10/39   | 0/39               | 9/39                     | 17/39  | 11/39 | 17/39   | 0/39    | 28/39    | 39/39       | 0/39          | 0/39  |

Abbreviations

|                                   |                                     |                       |
|-----------------------------------|-------------------------------------|-----------------------|
| DOT - Directly observed treatment | SLI - Second Line Injectable        | FQN - Fluoroquinolone |
| PZA - Pyrazinamide                | EMB - Ethambutol                    | SM - Streptomycin     |
| KM - Kanamycin                    | AM - Amikacin                       | CM - Capreomycin      |
| OFX - Ofloxacin                   | MFX - Moxifloxacin                  | LFX - Levofloxacin    |
| GAT - Gathifloxacin               | PAS - Para-aminosalicylic acid      | CS - Cycloserine      |
| TZD - Terizidone                  | ETO/PTO - Ethionemide/Prothionamide | INH - Isoniazid       |
| BDQ - Bedaquiline                 | NR - Not reported                   |                       |

Footnotes

<sup>1</sup> Mean reported

<sup>2</sup> Studies 26, 33, 35, 50, 59, 65, 67 reported more than one cohort



Supplemental Table S5. End of treatment outcomes reported in the included studies

| Reference | Author, Year                 | Study participant | 6-month culture conversion | Cure                    | Complete | Failure                                  | Death    | Defaults | Relapse |
|-----------|------------------------------|-------------------|----------------------------|-------------------------|----------|------------------------------------------|----------|----------|---------|
| [18]      | Baghaei, 2011                | 80                |                            | 59/80 Cure + Complete   |          | 21/80 Failure + Death                    |          | 0/80     |         |
| [19]      | Bonnet, 2011                 | 68                | 37/68                      | 13/68                   | 9/68     | 5/68                                     | 16/68    | 25/68    |         |
| [20]      | Brust, 2013                  | 91                |                            |                         |          | Only reported adverse events             |          |          |         |
| [21]      | Brust, 2010                  | 1209              |                            | 491/1209                | 35/1209  | 208/1209                                 | 223/1209 | 252/1209 |         |
| [22]      | Brust, 2012                  | 80                | 66/80                      |                         |          | Only reported 6 month culture conversion |          |          |         |
| [23]      | Chand, 2014                  | 81                |                            | 41/81                   |          | 9/81                                     | 0/81     | 31/81    |         |
| [24]      | Duraisamy, 2014              | 179               |                            | 77/179                  | 35/179   | 9/179                                    | 30/179   | 28/179   |         |
| [25]      | Farley, 2011                 | 757               |                            | 159/757                 | 189/757  | 74/757                                   | 177/757  | 158/757  |         |
| [26]      | Ganzaya, 2013 <sup>1</sup>   | 31                |                            | 20/31                   | 4/31     | 0/31                                     | 0/31     | 7/31     |         |
|           |                              | 31                |                            | 18/31                   | 4/31     | 4/31                                     | 1/31     | 4/31     |         |
|           |                              | 76                |                            | 44/76                   | 6/76     | 8/76                                     | 7/76     | 10/76    |         |
| [27]      | Hire, 2014                   | 110               |                            |                         |          | Only reported adverse events             |          |          |         |
| [28]      | Jain, 2014                   | 130               | 84/130                     | 51/130                  | 7/130    | 17/130                                   | 25/130   | 30/130   |         |
| [29]      | Joseph, 2011                 | 38                | 33/38                      | 25/38                   | 0/38     | 5/38                                     | 3/38     | 5/38     |         |
| [30]      | Malla, 2009                  | 175               | 112/175                    | 123/175                 | 0/175    | 9/175                                    | 14/175   | 29/175   |         |
| [31]      | Modongo, 2014                | 437               |                            |                         |          | Only reported 6 month culture conversion |          |          |         |
| [32]      | Mugabo, 2015                 | 363               |                            | 131/363                 | 61/363   | 29/363                                   | 45/363   | 97/363   |         |
| [33]      | Nagaraja, 2012 <sup>1</sup>  | 146               |                            | 100/146                 |          | 4/146                                    | 5/146    | 37/146   |         |
|           |                              | 39                |                            | 23/39                   |          | 0/39                                     | 1/39     | 15/39    |         |
|           |                              | 20                |                            | 11/20                   |          | 0/20                                     | 2/20     | 7/20     |         |
|           |                              | 19                |                            | 11/19                   |          | 1/19                                     | 2/19     | 5/19     |         |
| [34]      | Oladimeji, 2014              | 162               | 138/162                    |                         |          | Only reported 6 month culture conversion |          |          |         |
| [35]      | Rodriguez, 2013 <sup>1</sup> | 55                |                            | 40/55                   | 3/55     | 4/55                                     | 6/55     | 2/55     |         |
|           |                              | 50                |                            | 33/50                   | 2/50     | 2/50                                     | 6/50     | 7/50     |         |
| [36]      | Tabarsi, 2009                | 33                |                            | 29/33                   |          | 4/33 Failure + Death                     |          | 0/33     |         |
| [37]      | Tabarsi, 2010                | 51                |                            | 39/51                   |          | 8/51                                     | 4/51     | 0/51     |         |
| [38]      | Tabarsi, 2011                | 53                |                            | 33/53                   |          | 6/53                                     | 7/53     | 7/53     |         |
| [39]      | Van der Walt, 2013           | 1390              |                            | 376/1390                | 334/1390 | 121/1390                                 | 270/1390 | 289/1390 |         |
| [40]      | Ahmad, 2015                  | 196               |                            | 135/196                 | 1/196    | 8/196                                    | 35/196   | 17/196   |         |
| [41]      | Blondal, 2012                | 211               |                            | 129/211 Cure + Complete |          | 18/211                                   | 17/211   | 47/211   | 11/211  |

| Reference | Author, Year                | Study participant | 6-month culture conversion | Cure     | Complete        | Failure                                  | Death                                | Defaults | Relapse |
|-----------|-----------------------------|-------------------|----------------------------|----------|-----------------|------------------------------------------|--------------------------------------|----------|---------|
| [42]      | Bloss, 2010                 | 1027              |                            | 681/1027 | 16/1027         | 124/1027                                 | 60/1027                              | 146/1027 |         |
| [43, 44]  | Cegielski, 2015; Yuen, 2015 | 1244              | 847/1137                   | 656/1244 | 66/1244         | 172/1244                                 | 79/1244                              | 271/1244 |         |
| [45]      | Chan, 2013                  | 651               | 316/651                    | 461/651  | Cure + Complete | 190/651                                  | Failure+ Death+ Defaults             |          |         |
| [46]      | Chang, 2012                 | 194               |                            | 127/194  | Cure + Complete | 67/194                                   | Failure + Death + Defaults + Relapse |          |         |
| [47]      | Charles, 2014               | 110               |                            |          |                 | Only reported 6 month culture conversion |                                      |          |         |
| [48]      | Dawson, 2015                | 26                |                            |          |                 | Only reported adverse events             |                                      |          |         |
| [49]      | Dheda, 2010                 | 174               | 23/174                     |          |                 | Only reported 6 month culture conversion |                                      |          |         |
| [50]      | Diacon, 2014                | 66                | 52/66                      | 38/66    |                 | 5/66                                     | 8/66                                 | 15/66    |         |
|           |                             | 66                | 38/66                      | 21/66    |                 | 20/66                                    | 2/66                                 | 23/66    |         |
| [51]      | El-Din, 2015                | 138               |                            | 122/138  | 4/138           | 0/138                                    | 11/138                               | 1/138    |         |
| [52]      | Ferrer, 2010                | 46                |                            | 30/46    |                 | 3/46                                     | 2/46                                 | 11/46    |         |
| [53]      | Gegia, 2012                 | 380               |                            | 153/380  | 48/380          | 37/380                                   | 59/380                               | 83/380   |         |
| [54]      | Guglielmetti, 2015          | 35                | 28/29                      |          |                 | Only reported 6 month culture conversion |                                      |          |         |
| [55]      | Hafkin, 2013                | 70                | 36/70                      |          |                 | Only reported 6 month culture conversion |                                      |          |         |
| [56]      | Helbling, 2014              | 51                |                            | 2/51     | 37/51           | 3/51                                     | 2/51                                 | 7/51     |         |
| [57]      | Hicks, 2014                 | 84                |                            | 50/84    | 16/84           | 4/84                                     | 9/84                                 | 5/84     |         |
| [58]      | Jana, 2009                  | 31                |                            | 20/31    |                 | 6/31                                     | 1/31                                 | 0/31     | 4/31    |
| [59]      | Jiang, 2013 <sup>1</sup>    | 72                |                            | 32/72    | 15/72           | 19/72                                    | 3/72                                 | 3/72     | 14/72   |
|           |                             | 86                |                            | 32/86    | 16/86           | 26/86                                    | 5/86                                 | 7/86     | 12/86   |
| [60]      | Jo, 2014                    | 70                |                            | 32/70    | 4/70            | 22/70                                    | 1/70                                 | 11/70    |         |
| [61]      | Karagoz, 2009               | 142               |                            | 102/142  | 0/142           | 10/142                                   | 14/142                               | 16/142   |         |
| [62]      | Kempker, 2015               | 141               |                            | 38/140   | 41/140          | 6/140                                    | 11/140                               | 44/140   |         |
| [63]      | Koh, 2013                   | 155               |                            |          |                 | Only reported adverse events             |                                      |          |         |
| [64]      | Kvasnovsky, 2011            | 206               |                            |          |                 | Only reported adverse events             |                                      |          |         |
| [65]      | Kwak, 2015 <sup>1</sup>     | 123               |                            | 92/123   | 11/123          | 7/123                                    | 5/123                                | 6/123    | 2/123   |
|           |                             | 86                |                            | 43/86    | 3/86            | 24/86                                    | 9/86                                 | 4/86     | 3/86    |
|           |                             | 125               |                            | 64/125   | 22/125          | 16/125                                   | 10/125                               | 10/125   | 3/125   |
| [66]      | Laniado-Laborín, 2012       | 42                | 42/42                      |          |                 | Only reported 6 month culture conversion |                                      |          |         |
| [67]      | Lee, 2011 <sup>1</sup>      | 123               |                            | 68/123   | 29/123          | 6/123                                    | 4/123                                | 16/123   |         |
|           |                             | 48                |                            | 32/48    | 8/48            | 5/48                                     | 1/48                                 | 2/48     |         |
| [68]      | Leimane, 2010               | 1027              |                            | 681/1027 | 16/1027         | 124/1027                                 | 60/1027                              | 145/1027 |         |
| [69]      | Liu, 2011                   | 576               |                            | 175/576  | 121/576         | 152/576                                  | 19/576                               | 109/576  |         |

| Reference | Author, Year            | Study participant | 6-month culture conversion | Cure    | Complete | Failure                                  | Death               | Defaults | Relapse |
|-----------|-------------------------|-------------------|----------------------------|---------|----------|------------------------------------------|---------------------|----------|---------|
| [70]      | Marks, 2014             | 135               |                            |         | 105/134  |                                          | 12/134              | 17/134   |         |
| [71]      | Milanov, 2015           | 50                |                            | 16/50   | 8/50     | 6/50                                     | 19/50               | 1/50     |         |
| [72]      | Miller, 2012            | 407               |                            | 232/407 | 15/407   | 45/407                                   | 22/407              | 93/407   |         |
| [73]      | Modongo, 2012           | 213               |                            |         |          | Only reported adverse events             |                     |          |         |
| [74]      | Ndjeka, 2015            | 91                | 48/63                      |         |          | Only reported 6 month culture conversion |                     |          |         |
| [75]      | O'Donnell, 2013         | 114               |                            | 15/114  | 10/114   | 22/114                                   | 48/114              | 19/114   |         |
| [76]      | O'Donnell, 2015         | 216               | 47/216                     |         |          | Only reported 6 month culture conversion |                     |          |         |
| [77]      | Palacios, 2012          | 52                |                            | 11/52   |          | 1/52                                     | 31/52               | 9/52     |         |
| [78]      | Pazarli, 2013           | 103               |                            | 89/103  |          | 4/103                                    | 8/103               | 2/103    |         |
| [79]      | Pietersen, 2014         | 107               |                            | 7/107   | 10/107   | 25/107                                   | 49/107              | 16/107   |         |
| [80]      | Podewils, 2013          | 583               |                            | 384/583 | 15/583   | 21/583                                   | 75/583              | 88/583   |         |
| [81]      | Qazi, 2011              | 85                | 40/85                      |         |          | Only reported 6 month culture conversion |                     |          |         |
| [82]      | Roberts-Witteveen, 2015 | 44                |                            | 19/44   | 17/44    | 0/44                                     | 3/44                | 5/44     |         |
| [83]      | Satti, 2012             | 134               |                            | 71/134  | 12/134   | 1/134                                    | 46/134              | 4/134    |         |
| [84]      | Seddon, 2012            | 111               |                            | 74/111  | 17/111   | 1/111                                    | 11/111              | 8/111    |         |
| [85]      | Seung, 2014             | 213               | 65/213                     |         |          |                                          | 11/213 <sup>3</sup> |          |         |
| [86]      | Shean, 2013             | 115               | 26/115                     |         |          | Only reported 6 month culture conversion |                     |          |         |
| [87]      | Smith, 2015             | 171               |                            |         | 94/171   | 18/171                                   | 20/171              | 39/171   |         |
| [88]      | Tang, 2013              | 586               |                            | 92/586  | 148/586  | 280/586                                  | 22/586              | 44/586   |         |
| [89]      | Tang, 2015              | 65                |                            | 24/65   | 10/65    | 19/65                                    | 5/65                | 7/65     |         |
| [90]      | Van Heurck, 2013        | 78                |                            | 0       | 42/84    | 5/84                                     | 1/84                | 36/84    |         |
| [91]      | Xu, 2012                | 39                |                            | 15/39   |          | 9/39                                     | 0/38                | 15/38    |         |

#### Footnotes

<sup>1</sup> Studies 23, 30, 32, 47, 56, 62, 64 reported more than one cohort

<sup>2</sup> Whether the treatment outcome definitions meet the criteria defined by Laserson, 2005

**Cure:** An MDR-TB patient who has completed treatment according to country protocol and has been consistently culture-negative (with at least five results) for the final 12 months of treatment. If only one positive culture is reported during that time, and there is no concomitant clinical evidence of deterioration, a patient may still be considered cured, provided that this positive culture is followed by a minimum of three consecutive negative cultures, taken at least 30 days apart.

**Treatment completed:** An MDR-TB patient who has completed treatment according to country protocol but does not meet the definition for cure or treatment failure due to lack of bacteriologic results (i.e., fewer than five cultures were performed in the final 12 months of therapy).

**Treatment failure:** Treatment will be considered to have failed if two or more of the five cultures recorded in the final 12 months are positive, or if any one of the final three cultures is positive. Treatment will also be considered to have failed if a clinical decision has been made to terminate treatment early due to poor response or adverse events.

**Death:** An MDR-TB patient who dies for any reason during the course of MDR-TB treatment.

**Default:** An MDR-TB patient whose MDR-TB treatment was interrupted for 2 or more consecutive months for any reason.

<sup>3</sup> Eleven patients died during the follow up of 6 months.



| Reference | Author, Year               | Study participant | Reported adverse events | Reported Grade 3-5 AEs | Reported Drug stopped due to AEs | PZA                                                                                                                            | EMB   | Injectable                                                                    | Fluoroquinolones      | PAS                             | CS/TZD | ETO/PTO | Group 5     | BDQ  |
|-----------|----------------------------|-------------------|-------------------------|------------------------|----------------------------------|--------------------------------------------------------------------------------------------------------------------------------|-------|-------------------------------------------------------------------------------|-----------------------|---------------------------------|--------|---------|-------------|------|
| [39]      | Van der Walt, 2013         | 1390              | Yes                     | No                     | Yes                              | In 83/1390 drugs were withdrawn, either permanently or with reintroduction once the AE resolved. Specific drugs not identified |       |                                                                               |                       |                                 |        |         |             |      |
| [40]      | Ahmad, 2015                | 196               | Yes                     | No                     | No                               |                                                                                                                                |       |                                                                               |                       |                                 |        |         |             |      |
| [41]      | Blondal, 2012              | 211               | Yes                     | No                     | Yes                              |                                                                                                                                |       |                                                                               |                       | 77/211 stopped second line dugs |        |         |             |      |
| [42]      | Bloss, 2010                | 1027              | Yes                     | No                     | Yes                              | 40/560                                                                                                                         | 4/451 | 6/42 SM, 98/539 KM, 47/636 CM                                                 | 27/830 OFX, 9/506 CFX | 193/686                         | 58/870 | 114/871 | 127/761 THZ |      |
| [43, 44]  | Cegielki, 2015; Yuen, 2015 | 1244              | No                      | NA                     | NA                               | NA                                                                                                                             | NA    | NA                                                                            | NA                    | NA                              | NA     | NA      | NA          | NA   |
|           | Chan, 2013                 | 651               | No                      | NA                     | NA                               | NA                                                                                                                             | NA    | NA                                                                            | NA                    | NA                              | NA     | NA      | NA          | NA   |
| [45]      | Chan, 2013                 | 651               | No                      | NA                     | NA                               | NA                                                                                                                             | NA    | NA                                                                            | NA                    | NA                              | NA     | NA      | NA          | NA   |
| [46]      | Chang, 2012                | 194               | No                      | NA                     | NA                               | NA                                                                                                                             | NA    | NA                                                                            | NA                    | NA                              | NA     | NA      | NA          | NA   |
| [47]      | Charles, 2014              | 110               | Yes                     | Yes                    | Yes                              |                                                                                                                                |       |                                                                               |                       |                                 | 6/108  |         |             |      |
| [48]      | Dawson, 2015               | 26                | Yes                     | Yes                    | Yes                              |                                                                                                                                |       | 3/26 stopped study drug, 6/26 had grade 3-4 AEs, no specific drug information |                       |                                 |        |         |             |      |
| [49]      | Dheda, 2010                | 174               | Yes                     | No                     | Yes                              |                                                                                                                                |       | 26/161 stopped drug, no specific drug information                             |                       |                                 |        |         |             |      |
| [50]      | Diacon, 2014               | 132               | Yes                     | Yes                    | Yes                              |                                                                                                                                |       | Grade 3-4: 63/81. Stopped treatment: 9/81, no specific drug information       |                       |                                 |        |         |             |      |
| [51]      | El-Din, 2015               | 138               | Yes                     | No                     | No                               |                                                                                                                                |       |                                                                               |                       |                                 |        |         |             |      |
| [52]      | Ferrer, 2010               | 46                | No                      | NA                     | NA                               | NA                                                                                                                             | NA    | NA                                                                            | NA                    | NA                              | NA     | NA      | NA          | NA   |
| [53]      | Gegia, 2012                | 380               | No                      | NA                     | NA                               | NA                                                                                                                             | NA    | NA                                                                            | NA                    | NA                              | NA     | NA      | NA          | NA   |
| [54]      | Guglielmetti, 2015         | 35                | Yes                     | No                     | Yes                              |                                                                                                                                |       |                                                                               |                       |                                 |        |         |             | 2/35 |
| [55]      | Hafkin, 2013               | 70                | Yes                     | No                     | Yes                              |                                                                                                                                |       |                                                                               |                       |                                 | 6/48   |         |             |      |
| [56]      | Helbling, 2014             | 51                | Yes                     | No                     | No                               |                                                                                                                                |       |                                                                               |                       |                                 |        |         |             |      |
| [57]      | Hicks, 2014                | 84                | Yes                     | No                     | 0 stopped, 0 severe              |                                                                                                                                |       |                                                                               |                       |                                 |        |         |             |      |
| [58]      | Jana, 2009                 | 31                | Yes                     | No                     | Yes                              |                                                                                                                                |       | 1/18 KM                                                                       |                       |                                 |        |         |             |      |
| [59]      | Jiang, 2013'               | 158               | Yes                     | No                     | Yes                              | 1/110                                                                                                                          |       | 3/52 AM                                                                       |                       |                                 |        | 6/133   | 1/51 LZD    |      |
| [60]      | Jo, 2014                   | 70                | No                      | NA                     | NA                               | NA                                                                                                                             | NA    | NA                                                                            | NA                    | NA                              | NA     | NA      | NA          | NA   |
| [61]      | Karagoz, 2009              | 142               | Yes                     | No                     | Yes                              |                                                                                                                                |       | 50/142 stopped drugs due to AEs, no specific drug information                 |                       |                                 |        |         |             |      |
| [62]      | Kempker, 2015              | 141               | No                      | NA                     | NA                               | NA                                                                                                                             | NA    | NA                                                                            | NA                    | NA                              | NA     | NA      | NA          | NA   |
| [63]      | Koh, 2013                  | 155               | Yes                     | Yes                    | Yes                              |                                                                                                                                |       | 4/78 LFX, 2/77 MFX                                                            |                       |                                 |        |         |             |      |
| [64]      | Kvasnovsky, 2011           | 206               | Yes                     | No                     | Yes                              |                                                                                                                                |       |                                                                               |                       | 4/170                           |        | 29/145  |             |      |

| Reference | Author, Year            | Study participant | Reported adverse events | Reported Grade 3-5 AEs | Reported Drug stopped due to AEs | PZA | EMB  | Injectable        | Fluoroquinolones                                  | PAS   | CS/TZD | ETO/PTO | Group 5   | BDQ  |
|-----------|-------------------------|-------------------|-------------------------|------------------------|----------------------------------|-----|------|-------------------|---------------------------------------------------|-------|--------|---------|-----------|------|
| [65]      | Kwak, 2015*             | 334               | Yes                     | No                     | Yes                              |     |      |                   |                                                   |       |        |         | 2/12 LZD  |      |
| [66]      | Laniado-Laborin, 2012   | 42                | Yes                     | No                     | No                               |     |      |                   |                                                   |       |        |         |           |      |
| [67]      | Lee, 2011*              | 171               | Yes                     | No                     | No                               |     |      |                   |                                                   |       |        |         |           |      |
| [68]      | Leimane, 2010           | 1027              | Yes                     | No                     | No                               |     |      |                   |                                                   |       |        |         |           |      |
| [69]      | Liu, 2011               | 576               | No                      | NA                     | NA                               | NA  | NA   | NA                | NA                                                | NA    | NA     | NA      | NA        | NA   |
| [70]      | Marks, 2014             | 135               | Yes                     | No                     | Yes                              |     |      |                   |                                                   |       |        |         | 6/9 CFZ   |      |
| [71]      | Milanov, 2015           | 50                | No                      | NA                     | NA                               | NA  | NA   | NA                | NA                                                | NA    | NA     | NA      | NA        | NA   |
| [72]      | Miller, 2012            | 407               | Yes                     | No                     | No                               |     |      |                   |                                                   |       |        |         |           |      |
| [73]      | Modongo, 2012           | 213               | Yes                     | No                     | No                               |     |      |                   |                                                   |       |        |         |           |      |
| [74]      | Ndjeka, 2015            | 91                | Yes                     | No                     | Yes                              |     |      |                   |                                                   |       |        |         |           | 1/91 |
| [75]      | O'Donnell, 2013         | 114               | Yes                     | Similar                | Yes                              |     |      | 4/103 CM died     |                                                   |       | 8/109  |         |           |      |
| [76]      | O'Donnell, 2015         | 216               | No                      | NA                     | NA                               | NA  | NA   | NA                | NA                                                | NA    | NA     | NA      | NA        | NA   |
| [77]      | Palacios, 2012          | 52                | Yes                     | No                     | Yes                              |     |      |                   | 25/52 stopped drugs, no specific drug information |       |        |         |           |      |
| [78]      | Pazarli, 2013           | 103               | No                      | NA                     | NA                               | NA  | NA   | NA                | NA                                                | NA    | NA     | NA      | NA        | NA   |
| [79]      | Pietersen, 2014         | 107               | No                      | NA                     | NA                               | NA  | NA   | NA                | NA                                                | NA    | NA     | NA      | NA        | NA   |
| [80]      | Podewils, 2013          | 583               | No                      | NA                     | NA                               | NA  | NA   | NA                | NA                                                | NA    | NA     | NA      | NA        | NA   |
| [81]      | Qazi, 2011              | 85                | No                      | NA                     | NA                               | NA  | NA   | NA                | NA                                                | NA    | NA     | NA      | NA        | NA   |
| [82]      | Roberts-Witteveen, 2015 | 44                | Yes                     | No                     | Yes                              |     |      | 12/37 AM          |                                                   | 1/9   |        |         | 3/24 CFZ  |      |
| [83]      | Satti, 2012             | 134               | No                      | NA                     | NA                               | NA  | NA   | NA                | NA                                                | NA    | NA     | NA      | NA        | NA   |
| [84]      | Seddon, 2012            | 111               | No                      | NA                     | NA                               | NA  | NA   | NA                | NA                                                | NA    | NA     | NA      | NA        | NA   |
| [85]      | Seung, 2014             | 213               | No                      | NA                     | NA                               | NA  | NA   | NA                | NA                                                | NA    | NA     | NA      | NA        | NA   |
| [86]      | Shean, 2013             | 115               | Yes                     | Yes                    | Yes                              |     | 1/46 | 1/3 AM, 14/104 CM |                                                   | 7/101 | 2/104  | 7/66    | 2/65 AMC  |      |
| [87]      | Smith, 2015             | 202               | No                      | NA                     | NA                               | NA  | NA   | NA                | NA                                                | NA    | NA     | NA      | NA        | NA   |
| [88]      | Tang, 2013              | 586               | No                      | NA                     | NA                               | NA  | NA   | NA                | NA                                                | NA    | NA     | NA      | NA        | NA   |
| [89]      | Tang, 2015              | 65                | Yes                     | No                     | Yes                              |     |      |                   | 3/65 stopped drugs, no specific drug information  |       |        |         |           |      |
| [90]      | Van Heurck, 2013        | 78                | Yes                     | No                     | No                               |     |      |                   |                                                   |       |        |         |           |      |
| [91]      | Xu, 2012                | 39                | Yes                     | No                     | Yes                              |     |      |                   |                                                   |       |        |         | 23/39 CFZ |      |

**Abbreviations**

|                    |                                     |                               |                     |
|--------------------|-------------------------------------|-------------------------------|---------------------|
| AE - Adverse event | PZA - Pyrazinamide                  | EMB - Ethambutol              | NA - Not applicable |
| SM - Streptomycin  | KM - Kanamycin                      | AM - Amikacin                 |                     |
| CM - Capreomycin   | OFX - Ofloxacin                     | MFX - Moxifloxacin            |                     |
| LFX - Levofloxacin | PAS - Para- aminosalicylic acid     | CS - Cycloserine              |                     |
| TZD - Terizidone   | ETO/PTO - Ethionemide/Prothionamide | BDQ - Bedaquiline             |                     |
| LZD - Linezolid    | CFZ - Clofazimine                   | AMC - Amoxicillin/clavulanate |                     |

**Footnotes**

<sup>1</sup> Studies 26, 33, 35, 50, 59, 65, 67 reported more than one cohort, while the adverse event information is for the whole

Supplemental Table S7. Summary table of demographic and clinical characteristics of studies reporting severe adverse events (SAE).

|                                             | Reported any SAE and identified the related drug | Did not report SAE/ or did not identify the related drug | Totals       |
|---------------------------------------------|--------------------------------------------------|----------------------------------------------------------|--------------|
| <b>Studies (Cohorts)</b>                    | 19 (20)                                          | 55 (64)                                                  | 74 (84)      |
| <b>Total Number of participants</b>         | 2,858                                            | 14,636                                                   | 17,494       |
| <b>Age (median years)</b>                   | 36.6                                             | 36.4                                                     | 36.4         |
| <b>Clinical Characteristics<sup>1</sup></b> |                                                  |                                                          |              |
| History of prior treatment with FLD         | 997/1,673                                        | 3,626/5,291                                              | 4,623/6,964  |
| History of prior treatment with SLD         | 484/1,792                                        | 1,219/4,979                                              | 1,703/6,771  |
| Patients with cavitation on CXR             | 807 /2,076                                       | 4,281/7,185                                              | 5,088/9,261  |
| Patients with HIV co-infection              | 493/ 2,797                                       | 2,618/13,475                                             | 3,111/16,272 |
| Patients with HIV receiving ART             | 344 /493                                         | 959/2,618                                                | 1,303/3,111  |
| Positive AFB smears                         | 771/1,047                                        | 5,286/7,796                                              | 6,057/8,843  |
| <b>Drugs Received</b>                       |                                                  |                                                          |              |
| Pyrazinamide                                |                                                  |                                                          |              |
| Ethambutol                                  | 1,325                                            | 3,970                                                    | 5,295        |
| Amikacin / Kanamycin                        | 1,441                                            | 7,597                                                    | 9,038        |
| Capreomycin                                 | 1,286                                            | 1,957                                                    | 3,243        |
| Ofloxacin / Ciprofloxacin                   | 1,408                                            | 8,341                                                    | 9,749        |
| Moxifloxacin / levofloxacin                 | 827                                              | 3,978                                                    | 4,805        |
| Thiamide                                    | 2,106                                            | 10,522                                                   | 12,628       |
| Cycloserine / Terizidone                    | 2,140                                            | 6,086                                                    | 8,226        |
| PAS                                         | 1,706                                            | 4,304                                                    | 6,010        |
| <b>Regimen</b>                              |                                                  |                                                          |              |
| Individualized                              | 2,453                                            | 9,087                                                    | 11,540       |
| Standardized                                | 405                                              | 5,549                                                    | 5,954        |

**Abbreviations:** AFB - Acid-fast Bacilli, ART - Anti-retroviral treatment, CXR - Chest x-ray, FLD- First line-drug, SLD- Second line drug

**Footnotes**

<sup>1</sup>- For clinical characteristics variables, we added the denominator, since not all studies reported the clinical variables. The reporting of these clinical variables was not a criterion for inclusion in the review.



**Supplemental Table S8. Pooled success rate according to resistance pattern**

|                                                    | Cohorts | N success/N patients | Pooled success rate <sup>1</sup><br>(95% CI) |
|----------------------------------------------------|---------|----------------------|----------------------------------------------|
| Only MDR <sup>2</sup>                              | 17      | 2559/4190            | 61% (53%-68%)                                |
| Mixed MDR or not reported <sup>3</sup>             | 44      | 5869/9913            | 65% (61%-70%)                                |
| Only XDR <sup>4</sup>                              | 15      | 193/730              | 31% (19%-42%)                                |
| <b>% of patients resistant to SLI <sup>5</sup></b> |         |                      |                                              |
| 0-11.9%                                            | 7       | 1578/2463            | 67% (56%-79%)                                |
| 11.9-31.3%                                         | 8       | 333/522              | 63% (51%-74%)                                |
| 31.3%-60.7%                                        | 8       | 1217/2051            | 55% (44%-67%)                                |
| ≥60.7%                                             | 8       | 1136/1804            | 63% (51%-75%)                                |
| <b>% of patients resistant to FQN<sup>6</sup></b>  |         |                      |                                              |
| 0-6.4%                                             | 8       | 1061/1792            | 58% (47%-70%)                                |
| 6.4-22.1%                                          | 7       | 1023/1510            | 65% (54%-77 %)                               |
| 22.1%-55.3%                                        | 9       | 1333/2157            | 66% (56 %- 76 %)                             |
| ≥55.3%                                             | 7       | 826/1355             | 57% (44%-69 %)                               |

**Abbreviations:** MDR- Multi drug resistant, XDR- Extensively drug resistant, CI confidential intervals **SLI: Second-line injectable**

**Notes:**

1-Success outcome defined if cure or completed treatment

2-Only MDR: Only studies (cohorts) that reported only MDR or end of treatment outcome stratified by resistant pattern (i.e. MDR vs. XDR)

3-Mixed MDR or not reported: Studies that did not reported end of treatment outcomes stratified by resistant pattern or not informed if included XDR patients

4-Only XDR: Cohorts that reported only XDR patients or end of treatment stratified by resistant pattern

5-MDR patients also resistant to second line injectable, quartiles were used to categorize the variable, excluding all XDR cohorts and XDR patients from outcomes.

6-MDR patients also resistant to fluoroquinolones, quartiles were used to categorize the variable; excluding all XDR cohorts and XDR patients from outcomes.

Supplemental Table S9- Covariates associated with end of treatment outcomes for patients who received standardized regimens, XDR patients excluded<sup>1</sup>

| Variable                                                                             | Success/ Success + Fail + Relapse <sup>2</sup> |           |                      |           | Success/ Success + Fail + Relapse + Death |           |                      |           |
|--------------------------------------------------------------------------------------|------------------------------------------------|-----------|----------------------|-----------|-------------------------------------------|-----------|----------------------|-----------|
|                                                                                      | Cohorts                                        | Events    | Pooled Success rates |           | Cohorts                                   | Events    | Pooled Success rates |           |
|                                                                                      |                                                |           | Estimate             | 95% CI    |                                           |           | Estimate             | 95% CI    |
| <b>Any patients with HIV co-infection</b>                                            |                                                |           |                      |           |                                           |           |                      |           |
| No                                                                                   | 11                                             | 414/465   | 90%                  | 85%-95%   | 11                                        | 414/518   | 81%                  | 74%-88%   |
| Yes                                                                                  | 12                                             | 2217/2685 | 91%                  | 86%- 95%  | 12                                        | 2127/3496 | 74%                  | 67%-82%   |
| <b>Age<sup>3</sup></b>                                                               |                                                |           |                      |           |                                           |           |                      |           |
| ≤ 34 year (median)                                                                   | 13                                             | 1067/1333 | 88%                  | 81%-95%   | 13                                        | 1067/1625 | 79%                  | 72%-86%   |
| > 34 year                                                                            | 10                                             | 1564/1817 | 87%                  | 80%-94%   | 10                                        | 1564/2389 | 71%                  | 63%-79%   |
| <b>Number drugs used in the Initial intensive phase</b>                              |                                                |           |                      |           |                                           |           |                      |           |
| 4-5 drugs                                                                            | 14                                             | 1998/2440 | 90%                  | 85%-94%   | 14                                        | 1998/3174 | 76%                  | 69%-83%   |
| ≥ 6 drugs                                                                            | 9                                              | 633/710   | 91%                  | 86%- 96%  | 9                                         | 633/840   | 80%                  | 72%-88%   |
| <b>Duration of the intensive phase</b>                                               |                                                |           |                      |           |                                           |           |                      |           |
| 4-5 months                                                                           | 3                                              | 1584/1987 | 81%                  | 73%-87%   | 3                                         | 1584/2657 | 59%                  | 50%-69%   |
| 6 months                                                                             | 6                                              | 312/331   | 95%                  | 92%-98%   | 6                                         | 312/399   | 80%                  | 74%-86%   |
| > 6 months                                                                           | 5                                              | 269/314   | 85%                  | 79%-91%   | 5                                         | 269/370   | 72%                  | 64%-80%   |
| <b>Used Pyrazinamide for all of the patients<sup>4</sup></b>                         |                                                |           |                      |           |                                           |           |                      |           |
| Yes                                                                                  | 18                                             | 2454/2958 | 89%                  | 85%-92%   | 18                                        | 2454/3775 | 78%                  | 72%-84%   |
| No                                                                                   | 2                                              | 55/66     | 84%                  | 70%-98%   | 2                                         | 55/87     | 63%                  | 40%-86%   |
| <b>Used Ethambutol for all of the patients<sup>4</sup></b>                           |                                                |           |                      |           |                                           |           |                      |           |
| Yes                                                                                  | 11                                             | 891/1040  | 88%                  | 84%-93%   | 11                                        | 891/1330  | 78%                  | 71%-86%   |
| No                                                                                   | 9                                              | 445/486   | 92%                  | 88%-95%   | 9                                         | 445/546   | 81%                  | 73.8%-89% |
| <b>Used Streptomycin for all of the patients</b>                                     |                                                |           |                      |           |                                           |           |                      |           |
| Yes                                                                                  | 3                                              | 46/47     | 98%                  | 94%-100%  | 3                                         | 46/51     | 91%                  | 81%-100%  |
| No                                                                                   | 20                                             | 2585/3103 | 89%                  | 86%-93%   | 20                                        | 2585/3963 | 76%                  | 71%-82%   |
| <b>Used Amikacin/Kanamycin for all of the patients<sup>5</sup></b>                   |                                                |           |                      |           |                                           |           |                      |           |
| Yes                                                                                  | 16                                             | 2132/2565 | 90%                  | 86%-94%   | 17                                        | 2132/3218 | 78%                  | 72%-85%   |
| No                                                                                   | 3                                              | 44/50     | 91%                  | 80%-100%  | 3                                         | 44/68     | 71%                  | 52%-91 %  |
| <b>Used Capreomycin for all of the patients<sup>5</sup></b>                          |                                                |           |                      |           |                                           |           |                      |           |
| Yes                                                                                  | 1                                              | 22/27     | 82%                  | 57 %-100% | 1                                         | 22/41     | 54%                  | 21%-84%   |
| No                                                                                   | 18                                             | 2154/2588 | 90%                  | 86%-94 %  | 18                                        | 2154/3245 | 79%                  | 73%-84%   |
| <b>Used Ofloxacin/Ciprofloxacin for all of the patients<sup>6</sup></b>              |                                                |           |                      |           |                                           |           |                      |           |
| Yes                                                                                  | 14                                             | 2233/2718 | 88%                  | 84%-93%   | 14                                        | 2233/3516 | 75%                  | 68%-81%   |
| No                                                                                   | 2                                              | 153/171   | 89%                  | 78%-99%   | 2                                         | 153/201   | 78%                  | 63%-93%   |
| <b>Used Levofloxacin for all of the patients<sup>6</sup></b>                         |                                                |           |                      |           |                                           |           |                      |           |
| Yes                                                                                  | 2                                              | 153/171   | 89%                  | 78%-99%   | 2                                         | 153/201   | 78%                  | 63%-93%   |
| No                                                                                   | 14                                             | 2233/2718 | 88%                  | 84%-93%   | 14                                        | 2233/3516 | 75%                  | 68%-81%   |
| <b>Used Moxifloxacin for all of the patients (none of the studies used the drug)</b> | -                                              | -         | -                    | -         | -                                         | -         | -                    | -         |

|                                                                                     | Success/ Success + Fail + Relapse |           |                      |          | Success/ Success + Fail + Relapse + Death |           |                      |         |
|-------------------------------------------------------------------------------------|-----------------------------------|-----------|----------------------|----------|-------------------------------------------|-----------|----------------------|---------|
|                                                                                     | Cohorts                           | Events    | Pooled Success rates |          | Cohorts                                   | Events    | Pooled Success rates |         |
|                                                                                     |                                   |           | Estimate             | 95% CI   |                                           |           | Estimate             | 95% CI  |
| <b>Used Cycloserine/Terizidone for all of the patients<sup>7</sup></b>              |                                   |           |                      |          |                                           |           |                      |         |
| Yes                                                                                 | 16                                | 978/1093  | 91%                  | 87%-94%  | 16                                        | 978/1282  | 78%                  | 72%-84% |
| No                                                                                  | 4                                 | 406/480   | 95%                  | 88%-100% | 4                                         | 406/660   | 85%                  | 74%-97% |
| <b>Used PAS for all of the patients<sup>8</sup></b>                                 |                                   |           |                      |          |                                           |           |                      |         |
| Yes                                                                                 | 2                                 | 122/131   | 92%                  | 83%-94 % | 2                                         | 122/150   | 78%                  | 61%-95% |
| No                                                                                  | 20                                | 2498/3007 | 90%                  | 83%-100% | 20                                        | 2498/3850 | 78%                  | 72%-83% |
| <b>Used Thiamide for all of the patients<sup>9</sup>(all studies used the drug)</b> | -                                 | -         | -                    | -        | -                                         | -         | -                    | -       |
| <b>High dose INH used (none of the studies used the drug)<sup>10</sup></b>          | -                                 | -         | -                    | -        | -                                         | -         | -                    | -       |

**Abbreviations:** XDR - Extensively drug resistant, CI - Confidential intervals, FQN - Fluoroquinolone, PAS - para-aminosalicylic acid

#### Footnote

<sup>1</sup> Out of 28 cohorts that reported standardized regimen, 23 reported end of treatment outcomes (similar or equal to Laserson's Criteria). All identified XDR cases were excluded from end of treatment outcomes.

<sup>2</sup> No studies reported relapse.

<sup>3</sup> Median (based on all eligible cohorts for this analysis) was used to categorize the variable.

<sup>4</sup> 3 cohorts had no clear information of how many participants used the drug, so they were excluded from the analysis. Two cohorts reported that the used of the drug depended of the drug susceptibility test and the other reported that used "first line drug".

<sup>5</sup> 4 cohorts had no clear information of what second line injectable used, so they were excluded of the analysis.

<sup>6</sup> 7 cohorts had no clear information of what fluoroquinolone was used (if early generation or levofloxacin), all 7 cohorts were excluded from the analysis.

<sup>7</sup> 3 cohorts had no clear information of how many participants used the drug, so they were excluded from the analysis.

<sup>8</sup> 1 cohorts had no clear information of how many participants used the drug, so it was excluded from the analysis.

<sup>9</sup> Ethionamide or Prothionamide were analyzed together

<sup>10</sup> No studies reported the use of high dose INH.

Supplemental Table S10. Covariates associated with end of treatment outcomes for patients who received individualized regimens, XDR patients excluded (n=38 cohorts)<sup>1</sup>

| Variable                                                                     | Success/ Success + Fail + Relapse |           |                      |          | Success/ Success + Fail + Relapse + Death |           |                      |         |
|------------------------------------------------------------------------------|-----------------------------------|-----------|----------------------|----------|-------------------------------------------|-----------|----------------------|---------|
|                                                                              | Cohorts                           | Events    | Pooled Success rates |          | Cohorts                                   | Events    | Pooled Success rates |         |
|                                                                              |                                   |           | Estimate             | 95% CI   |                                           |           | Estimate             | 95% CI  |
| <b>Any patients with HIV co-infection</b>                                    |                                   |           |                      |          |                                           |           |                      |         |
| No                                                                           | 20                                | 2025/2545 | 86%                  | 78%-94%  | 20                                        | 2025/2782 | 78%                  | 69%-87% |
| Yes                                                                          | 18                                | 3772/4289 | 95%                  | 92%-99%  | 18                                        | 3772/4698 | 82%                  | 75%-90% |
| <b>Number drugs used in the Initial intensive phase<sup>2</sup></b>          |                                   |           |                      |          |                                           |           |                      |         |
| < 6 drugs                                                                    | 10                                | 1360/1586 | 92%                  | 85%-98%  | 10                                        | 1360/1698 | 82%                  | 76%-89% |
| 6 drugs                                                                      | 11                                | 2188/2549 | 88%                  | 79%-96%  | 11                                        | 2188/2789 | 76%                  | 69%-83% |
| > 6 drugs                                                                    | 5                                 | 204/279   | 85%                  | 70%-100% | 5                                         | 204/301   | 72%                  | 58%-85% |
| <b>Duration of the intensive phase<sup>3</sup></b>                           |                                   |           |                      |          |                                           |           |                      |         |
| ≤ 6 months                                                                   | 4                                 | 630/661   | 96%                  | 93%-98%  | 4                                         | 630/767   | 80%                  | 77%-83% |
| > 6 months                                                                   | 3                                 | 865/1028  | 88%                  | 82%-94%  | 3                                         | 865/1135  | 76%                  | 74%-79% |
| <b>Age<sup>4</sup></b>                                                       |                                   |           |                      |          |                                           |           |                      |         |
| < 39 years (median)                                                          | 19                                | 2383/2683 | 94%                  | 89%-98%  | 19                                        | 2383/3042 | 80%                  | 72%-89% |
| ≥ 39 years                                                                   | 19                                | 3414/4151 | 88%                  | 81%-95%  | 19                                        | 3414/4438 | 79%                  | 71%-89% |
| <b>% of patients who received Pyrazinamide<sup>5</sup></b>                   |                                   |           |                      |          |                                           |           |                      |         |
| < 64.5%                                                                      | 17                                | 3522/4071 | 91%                  | 85%- 98% | 17                                        | 3522/4486 | 81%                  | 72%-90% |
| ≥ 64.5%                                                                      | 17                                | 1831/2148 | 92%                  | 86%-98%  | 17                                        | 1831/2352 | 79%                  | 69%-89% |
| <b>% of patients who received Ethambutol<sup>6</sup> (terciles)</b>          |                                   |           |                      |          |                                           |           |                      |         |
| 0%                                                                           | 11                                | 1596/1865 | 86%                  | 76%-96%  | 12                                        | 1596/2079 | 77%                  | 65%-89% |
| 0.1 - 49.9%                                                                  | 13                                | 2603/3043 | 89%                  | 82%-97%  | 13                                        | 2603/3345 | 78%                  | 67%-89% |
| ≥ 50.0%                                                                      | 11                                | 1267/1431 | 97%                  | 94%-100% | 11                                        | 1267/1526 | 87%                  | 79%-95% |
| <b>Used Streptomycin for any of the patients<sup>7</sup></b>                 |                                   |           |                      |          |                                           |           |                      |         |
| Yes                                                                          | 15                                | 3309/3763 | 97%                  | 94%-99%  | 15                                        | 3309/4065 | 88%                  | 82%-94% |
| No                                                                           | 23                                | 2488/3071 | 85%                  | 77%-92%  | 23                                        | 2488/3415 | 73%                  | 65%-82% |
| <b>% of patients who received Amikacin or Kanamycin<sup>8</sup> (median)</b> |                                   |           |                      |          |                                           |           |                      |         |
| < 55.3%                                                                      | 12                                | 2776/3300 | 87%                  | 76%-98%  | 13                                        | 2776/3501 | 80%                  | 69%-91% |
| ≥ 55.3%                                                                      | 12                                | 1762/1962 | 97%                  | 92%-99%  | 13                                        | 1762/2236 | 81%                  | 71%-92% |
| <b>% of patients who received Capreomycin<sup>8</sup> (median)</b>           |                                   |           |                      |          |                                           |           |                      |         |
| < 24.4%                                                                      | 12                                | 2488/2840 | 96%                  | 91%-100% | 12                                        | 2488/3089 | 85%                  | 78%-94% |
| ≥ 24.4%                                                                      | 12                                | 2050/2422 | 89%                  | 79%-99 % | 12                                        | 2050/2648 | 74%                  | 61%-87% |
| <b>Used Ofloxacin/Ciprofloxacin for any of the patients<sup>9</sup></b>      |                                   |           |                      |          |                                           |           |                      |         |
| Yes                                                                          | 19                                | 4341/4979 | 95%                  | 91%-99%  | 19                                        | 4341/5414 | 84%                  | 77%-90% |
| No                                                                           | 11                                | 808/978   | 88%                  | 73%-98%  | 11                                        | 808/1104  | 76%                  | 65%-87% |
| <b>Used Levofloxacin for any of the patients<sup>10</sup></b>                |                                   |           |                      |          |                                           |           |                      |         |
| Yes                                                                          | 14                                | 2488/2878 | 94%                  | 88%-99%  | 14                                        | 2488/3148 | 82%                  | 75%-91% |
| No                                                                           | 14                                | 2357/2729 | 91%                  | 83%-98%  | 14                                        | 2357/2956 | 80%                  | 72%-89% |

| Variable                                                               | Success/ Success + Fail + Relapse |           |                      |          | Success/ Success + Fail + Relapse + Death |           |                      |         |
|------------------------------------------------------------------------|-----------------------------------|-----------|----------------------|----------|-------------------------------------------|-----------|----------------------|---------|
|                                                                        | Cohorts                           | Events    | Pooled Success rates |          | Cohorts                                   | Events    | Pooled Success rates |         |
|                                                                        |                                   |           | Estimate             | 95% CI   |                                           |           | Estimate             | 95% CI  |
| <b>Used Moxifloxacin for any of the patients<sup>10</sup></b>          |                                   |           |                      |          |                                           |           |                      |         |
| Yes                                                                    | 16                                | 3303/3840 | 92%                  | 85%-99%  | 16                                        | 3303/4166 | 82%                  | 74%-90% |
| No                                                                     | 12                                | 1542/1767 | 92%                  | 85%-99%  | 12                                        | 1542/1938 | 80%                  | 71%-90% |
| <b>% of patients who received any Later FQN<sup>11</sup> (median)</b>  |                                   |           |                      |          |                                           |           |                      |         |
| < 66.7%                                                                | 17                                | 3752/4393 | 91%                  | 84%-97%  | 17                                        | 3752/4812 | 79%                  | 71%-87% |
| ≥ 66.7%                                                                | 15                                | 1529/1742 | 91%                  | 85%-98%  | 15                                        | 1529/1903 | 82%                  | 74%-90% |
| <b>% of patients who received Cycloserine /terizidone<sup>12</sup></b> |                                   |           |                      |          |                                           |           |                      |         |
| < 21%                                                                  | 10                                | 1563/1999 | 81%                  | 67%-96%  | 10                                        | 1563/2163 | 75%                  | 62%-89% |
| 21.1% - 69.8%                                                          | 7                                 | 716/748   | 96%                  | 92%-100% | 7                                         | 716/776   | 90%                  | 82%-98% |
| ≥ 69.9%                                                                | 16                                | 3050/3444 | 93%                  | 88%-98%  | 16                                        | 3050/3858 | 78%                  | 68%-88% |
| <b>% of patients who received thiamide<sup>13</sup></b>                |                                   |           |                      |          |                                           |           |                      |         |
| < 50.0%                                                                | 8                                 | 970/1232  | 85%                  | 71 %-99% | 8                                         | 970/1355  | 78%                  | 65%-91% |
| 50.1% - 79.9%                                                          | 9                                 | 2582/2868 | 97%                  | 94%-100% | 9                                         | 2582/3090 | 90%                  | 83%-97% |
| ≥ 80.0%                                                                | 16                                | 1777/2091 | 90%                  | 83%-97%  | 16                                        | 1777/2352 | 74%                  | 64%-85% |
| <b>% of patients who received PAS<sup>14</sup> (median)</b>            |                                   |           |                      |          |                                           |           |                      |         |
| <50.0%                                                                 | 16                                | 1522/1658 | 94%                  | 89%-99%  | 16                                        | 1522/1825 | 86%                  | 79%-93% |
| ≥50.0%                                                                 | 17                                | 3807/4533 | 89%                  | 82%-97%  | 17                                        | 3807/4972 | 74%                  | 63%-84% |
| <b>Used high dose INH for any of the patients<sup>15</sup></b>         | -                                 | -         | -                    | -        | -                                         | -         | -                    | -       |
| <b>Used Bedaquiline (only one study used)<sup>16</sup></b>             |                                   |           |                      |          |                                           |           |                      |         |

**Abbreviations:** XDR - Extensively drug resistant, CI - Confidential intervals, FQN - Fluoroquinolone, PAS - para-aminosalicylic acid, INH - Isoniazid

**Footnote**

<sup>1</sup> Out of 56 cohorts that reported individualized regimen, 41 reported end of treatment outcomes (similar or equal to Laserson's criteria), and other 3 cohorts were excluded because only reported XDR cases. All identified XDR cases were excluded from analysis of end of treatment outcomes.

<sup>2</sup> Information was missing in 12 cohorts, so they were excluded from the analysis

<sup>3</sup> Out of the 38 cohorts, only 7 cohorts reported duration of intensive phase. Median (based on all eligible cohorts for this analysis) was used to categorize the variable.

<sup>4</sup> Median (based on all eligible cohorts for this analysis) was used to categorize the variable.

<sup>5</sup> 4 studies had no clear information of how many participants used the drug, so they were excluded from the analysis. Median was used to categorize the variable.

<sup>6</sup> 3 cohorts had no clear information of how many participants used the drug, so they were excluded from the analysis. The strata were defined using three major clusters.

<sup>7</sup> The strata were defined using the 2 major clusters: "used" vs. "not used".

<sup>8</sup> 14 cohorts had no clear information of what second line injectable used, so they were excluded from the analysis. The strata were defined observing two major clusters.

<sup>9</sup> 8 cohorts had information missing: in 5 cohorts it was not clear which quinolone generation (early or later generation) was used and in 3 cohorts it was not clear how many participants used ciprofloxacin or ofloxacin. All 8 cohorts were excluded from the analysis. The strata were defined using the 2 major clusters: "used" vs. "not used".

<sup>10</sup> 10 cohorts had information missing: in 5 cohorts it was not clear which quinolone generation (early or later generation) was used, in 4 cohorts it was not clear not clear what later generation was used levofloxacin or moxifloxacin and in 1 cohort it was not clear how many participants used the drug. All 10 cohorts were excluded from the analysis.

<sup>11</sup> 6 cohorts had information missing: in 5 cohorts it was not clear which quinolone generation (early or later generation) and in 1 cohort it was not clear how many participants used the drug. All 6 cohorts were excluded from the analysis. The strata were defined using two major clusters

<sup>12</sup> 5 cohorts had no clear information of how many participants used the drug, so they were excluded from the analysis. Three major strata were used to categorize the variable.

<sup>13</sup> 5 cohorts had no clear information of how many participants used the drug, so they were excluded from the analysis. Ethionamide and prothionamide analyzed together. Three major strata were used to categorize the variable.

<sup>14</sup> 5 cohorts had no clear information of how many participants used the drug, so they were excluded from the analysis. Two major strata used to categorize the variable.

<sup>15</sup> No studies reported the use of high dose INH.

<sup>16</sup> Only one study reported use of bedaquiline and reported end of treatment outcomes.

Supplemental Table S11. Covariates associated with end of treatment outcomes for XDR patients (n=15 cohorts)<sup>1</sup>

| Variable                                                                         | Success/ Success + Fail + Relapse |         |                |         | Success/ Success + Fail + Relapse + Death |         |                |         |
|----------------------------------------------------------------------------------|-----------------------------------|---------|----------------|---------|-------------------------------------------|---------|----------------|---------|
|                                                                                  | Cohorts                           | Events  | Pooled Success |         | Cohorts                                   | Events  | Pooled Success |         |
|                                                                                  |                                   |         | Estimate       | 95% CI  |                                           |         | Estimate       | 95% CI  |
| <b>Any patients with HIV co-infection</b>                                        |                                   |         |                |         |                                           |         |                |         |
| No                                                                               | 7                                 | 82/258  | 39%            | 16%-63% | 7                                         | 82/286  | 30%            | 13%-47% |
| Yes                                                                              | 8                                 | 111/208 | 65%            | 44%-86% | 8                                         | 111/346 | 42%            | 24%-61% |
| <b>Number drugs used in the Initial intensive phase<sup>2</sup></b>              |                                   |         |                |         |                                           |         |                |         |
| ≤ 5 drugs                                                                        | 4                                 | 27/55   | 62%            | 30%-95% | 4                                         | 27/78   | 42%            | 15%-68% |
| 6 drugs                                                                          | 6                                 | 105/172 | 55%            | 15%-98% | 6                                         | 105/255 | 50%            | 17%-84% |
| > 6 drugs                                                                        | 2                                 | 24/55   | 46%            | 11%-82% | 2                                         | 24/104  | 32%            | 3%-59%  |
| <b>Duration of intensive phase<sup>3</sup></b>                                   |                                   |         |                |         |                                           |         |                |         |
| 6 months                                                                         | 2                                 | 10/15   | 65%            | 42%-89% | 2                                         | 10/18   | 60%            | 24%-95% |
| > 6 months                                                                       | 3                                 | 17/43   | -              | -       | 3                                         | 17/69   | 15%            | 0%-42%  |
| <b>Age<sup>4</sup> (median)</b>                                                  |                                   |         |                |         |                                           |         |                |         |
| ≤ 40.87                                                                          | 8                                 | 82/166  | 58%            | 35%-81% | 8                                         | 82/283  | 42%            | 23%-62% |
| > 40.87                                                                          | 7                                 | 111/300 | 50%            | 24%-76% | 7                                         | 111/349 | 31%            | 14%-48% |
| <b>% Of patients who received Pyrazinamide<sup>5</sup> (median)</b>              |                                   |         |                |         |                                           |         |                |         |
| ≤ 83.8%                                                                          | 6                                 | 60/140  | 43%            | 23%-63% | 6                                         | 60/213  | 31%            | 16%-46% |
| >83.8%                                                                           | 7                                 | 106/171 | 69%            | 52%-85% | 7                                         | 106/253 | 47%            | 30%-63% |
| <b>Used Ethambutol for any of the patients<sup>6</sup></b>                       |                                   |         |                |         |                                           |         |                |         |
| No                                                                               | 6                                 | 81/129  | 66%            | 47%-86% | 6                                         | 81/164  | 45%            | 29%-61% |
| Yes                                                                              | 7                                 | 90/189  | 54%            | 36%-73  | 7                                         | 90/306  | 38%            | 23%-53% |
| <b>Used Streptomycin for any of the patients</b>                                 |                                   |         |                |         |                                           |         |                |         |
| No                                                                               | 11                                | 140/343 | 55%            | 34%-75% | 11                                        | 140/440 | 36%            | 22%-51% |
| Yes                                                                              | 4                                 | 53/123  | 53%            | 21%-85% | 4                                         | 53/192  | 37%            | 14%-61% |
| <b>% of patients who received Amikacin/Kanamycin<sup>7</sup></b>                 |                                   |         |                |         |                                           |         |                |         |
| ≤ 30.7%                                                                          | 4                                 | 56/124  | 40%            | 22%-59% | 4                                         | 56/227  | 25%            | 16%-33% |
| 30.8% - 50.9%                                                                    | 3                                 | 30/59   | 49%            | 34%-64% | 3                                         | 30/63   | 51%            | 32%-70% |
| ≥ 60%                                                                            | 3                                 | 27/56   | 45%            | 31%-58% | 3                                         | 27/76   | 39%            | 21%-57% |
| <b>% of patients who received Capreomycin patients (median used)<sup>8</sup></b> |                                   |         |                |         |                                           |         |                |         |
| ≤ 36.5%                                                                          | 5                                 | 48/104  | 42%            | 32%-51% | 5                                         | 48/127  | 43%            | 26%-60% |
| > 36.5%                                                                          | 5                                 | 65/135  | 48%            | 40%-56% | 5                                         | 65/239  | 31%            | 17%-46% |
| <b>% of patients who received Ofloxacin/ Ciprofloxacin<sup>9</sup> (median)</b>  |                                   |         |                |         |                                           |         |                |         |
| ≤ 29.9%                                                                          | 5                                 | 85/153  | 54%            | 47%-62% | 5                                         | 85/209  | 48%            | 30%-66% |
| > 29.9%                                                                          | 5                                 | 62/139  | 42%            | 34%-50% | 5                                         | 62/212  | 36%            | 19%-52% |
| <b>% of patients who received Levofloxacin (median)<sup>10,11</sup></b>          |                                   |         |                |         |                                           |         |                |         |
| ≤29.9%                                                                           | 5                                 | 70/145  | -              | -       | 5                                         | 70/249  | 34%            | 19%-50% |
| >29.9%                                                                           | 4                                 | 43/94   | -              | -       | 4                                         | 43/114  | 46%            | 25%-66% |

| Variable                                                                | Success/ Success + Fail + Relapse |        |                |         | Success/ Success + Fail + Relapse + Death |        |                |         |
|-------------------------------------------------------------------------|-----------------------------------|--------|----------------|---------|-------------------------------------------|--------|----------------|---------|
|                                                                         | Cohorts                           | Events | Pooled Success |         | Cohorts                                   | Events | Pooled Success |         |
|                                                                         |                                   |        | Estimate       | 95% CI  |                                           |        | Estimate       | 95% CI  |
| <b>% of patients who received Moxifloxacin (median)<sup>10,11</sup></b> |                                   |        |                |         |                                           |        |                |         |
| ≤ 20.3%                                                                 | 5                                 | 67/138 | -              | -       | 5                                         | 67/196 | 40%            | 23%-58% |
| > 20.3%                                                                 | 4                                 | 46/101 | -              | -       | 4                                         | 46/167 | 39%            | 17%-60% |
| <b>% of patients who received any Later FQN % (median)<sup>12</sup></b> |                                   |        |                |         |                                           |        |                |         |
| ≤25.2%                                                                  | 5                                 | 70/145 | 49%            | 39%-60% | 5                                         | 70/249 | 34%            | 19%-49% |
| >25.2%                                                                  | 5                                 | 77/147 | 53%            | 42%-63% | 5                                         | 77/172 | 49%            | 32%-66% |
| <b>Used Cycloserine for any of the patients<sup>13</sup></b>            |                                   |        |                |         |                                           |        |                |         |
| No                                                                      | 5                                 | 73/145 | 48%            | 26%-70% | 5                                         | 73/170 | 43%            | 26%-60% |
| Yes                                                                     | 8                                 | 98/173 | 68%            | 50%-87% | 8                                         | 98/300 | 41%            | 26%-55% |
| <b>% Of patients who received Thiamide<sup>14</sup></b>                 |                                   |        |                |         |                                           |        |                |         |
| ≤ 63.5%                                                                 | 3                                 | 20/43  | 57%            | 23%-91% | 3                                         | 20/46  | 52%            | 24%-80% |
| 63.6 - 80.6%                                                            | 5                                 | 83/160 | 58%            | 37%-80% | 5                                         | 83/250 | 36%            | 22%-51% |
| ≥ 80.7%                                                                 | 5                                 | 69/115 | 63%            | 39%-87% | 5                                         | 69/174 | 41%            | 25%-62% |
| <b>% Of patients who received PAS<sup>14</sup></b>                      |                                   |        |                |         |                                           |        |                |         |
| ≤ 51.2%                                                                 | 4                                 | 18/31  | 59%            | 32%-86% | 4                                         |        | 54%            | 30%-78% |
| 51.3% - 60.8%                                                           | 4                                 | 54/122 | 51%            | 23%-74% | 4                                         |        | 42%            | 24%-61% |
| ≥ 60.9%                                                                 | 5                                 | 99/165 | 67%            | 47%-87% | 5                                         |        | 35%            | 20%-50% |
| <b>Used high dose INH for any of the patients<sup>15</sup></b>          | -                                 | -      | -              | -       | -                                         | -      | -              | -       |

**Abbreviations:** XDR - Extensively drug resistant, CI - Confidential intervals, FQN - Fluoroquinolone, PAS - para-aminosalicylic acid

#### Footnote

<sup>1</sup> 7 studies (7 cohorts) reported only XDR patients, of which 3 reported end of treatment outcomes. Another 12 studies reported end of treatment outcomes stratified by resistant pattern (XDR were separated from MDR). For the pooled end of treatment analysis, we combined the results from the 3 cohorts of only XDR patients and the 12 cohorts of XDR patients from the studies that reported stratified results.

<sup>2</sup> Information was missing in 3 cohorts, so they were excluded from the analysis.

<sup>3</sup> Out of the 15 cohorts, only 5 cohorts reported duration of intensive phase.

<sup>4</sup> Median (based on all eligible cohorts for this analysis) was used to categorize the variable

<sup>5</sup> 2 cohorts had no clear information of how many participants used the drug, so they were excluded from the analysis. Median was used to categorize the variable.

<sup>6</sup> 2 cohorts had no clear information of how many participants used the drug, so they were excluded from the analysis. The strata were defined using the 2 major clusters: "used" vs. "not used".

<sup>7</sup> 5 cohorts had no clear information of what second line injectable used, so they were excluded of the analysis. The strata were defined using three major clusters.

<sup>8</sup> 5 cohorts had no clear information of what second line injectable used, so they were excluded of the analysis. Median was used to categorize the variable.

<sup>9</sup> 5 cohorts had information missing: in four cohorts it was not clear which quinolone generation (early or later generation) was used and in one cohort it was not clear how many participants used ciprofloxacin or ofloxacin. All 5 cohorts were excluded from the analysis.

<sup>10</sup> 6 cohorts had information missing: in 4 cohorts it was not clear what fluoroquinolone (early or later generation) was used, in one cohort not clear not clear what later generation used the drug (levofloxacin or moxifloxacin) and in one cohort not clear how many participants used the drug. All 6 cohorts were excluded from the analysis. Median was used to categorize the variable.

<sup>11</sup> Did not converge, the analysis of fail/relapse.

<sup>12</sup> 5 cohorts had information missing: in four cohorts it was not clear which quinolone generation (early or later generation) was used and in one cohort it was not clear how many participants used the drug. All 5 cohorts were excluded from the analysis. Median was used to categorize the variable

<sup>13</sup> 2 cohorts had no clear information of how many participants used the drug, so they were excluded from the analysis. The strata were defined using the 2 major clusters: "used" vs. "not used".

<sup>14</sup> 2 cohorts had no clear information of how many participants used the drug, so they were excluded from the analysis. Three major strata was used to categorize the variable.

<sup>15</sup> No studies that reported end of treatment outcomes used high dose INH.
